# Supplementary material for: Genome-Wide Association Study of African and European Americans Implicates Multiple Shared and Ethnic Specific Loci in Sarcoidosis Susceptibility
Source: PLoS One. 2012 Aug 27;7(8):e43907. doi: 10.1371/journal.pone.0043907 (PMC3428296; doi:10.1371/journal.pone.0043907)
Supplement: Table S2 — Association results with P<5×10−8 in either dataset. (XLS) [file pone.0043907.s005.xls]

## Sheet: Sheet1
Table S2. Association results with P < 5 x 10-8 in either dataset.
CHR	BP(hg 19)	SNP	Gene	Function	amino Acids	Protein Position	Minor Allele	Major Allele	African Americans											European Americans						PAll-Meta	Heterogeneity Test
									SNP Status	MAFAA-Disc	ORAA-Disc	SEAA-Disc	PAA-Disc	MAFAA-Rep	ORAA-Rep	SEAA-Rep	PAA-Rep	PAA-Meta		SNP Status	MAFEA	OREA	SEEA	PEA			Q	I2
6	31272612	rs6457375	HLA-C	intergenic	NA	NA	G	A	Genotyped	0.4232	0.875	0.06764	0.424271	0.403	1.169	0.09214	0.09063	0.7258		Genotyped	0.4897	1.579	0.07617	1.98e-09		9.8e-06	4.90709e-08	0.941
6	31303236	rs1634775	HLA-C	intergenic	NA	NA	A	G	Imputed	0.2689	0.9276	0.07707	0.737552	0.2595	0.9864	0.1055	0.897	0.7285		Imputed	0.3521	1.536	0.07786	3.58e-08		0.00035	7.13856e-06	0.916
6	31325792	rs9266250	HLA-B	near-gene-5	NA	NA	A	G	Imputed	0.2793	0.8594	0.0755	0.505444	0.2598	1.004	0.1021	0.9688	0.5747		Imputed	0.3639	1.519	0.0762	4.07e-08		2.48e-05	4.12925e-07	0.932
6	31325886	rs9266257	HLA-B	near-gene-5	NA	NA	NA	NA	NA	NA	NA	NA	NA	NA	NA	NA	NA	NA		Genotyped	0.2968	0.637755	0.07826	8.99e-09		NA	NA	NA
6	31326324	rs2596475	HLA-B	near-gene-5	NA	NA	C	T	Imputed	0.287	0.9043	0.07483	0.527498	0.2633	1.002	0.1019	0.984	0.6013		Imputed	0.3856	1.52	0.07608	3.82e-08		2.72e-05	2.97579e-06	0.921
6	32189841	rs715299	NOTCH4	intron	NA	NA	G	T	Genotyped	0.4539	1.296	0.06869	1.12e-05	0.4795	1.522	0.09409	8.14e-06	6.51e-10		Genotyped	0.3241	1.141	0.07929	0.09583		2.15e-08	0.0642	0.636
6	32219320	rs9267989	NOTCH4	intergenic	NA	NA	T	G	Imputed	0.04755	0.3917	0.1959	0.00141548	0.04359	0.4646	0.2453	0.00178	9.9e-06		Imputed	0.1943	0.6504	0.1099	9.04e-05		3.67e-09	0.056	0.653
6	32257284	rs9268145	C6orf10	intergenic	NA	NA	G	T	Genotyped	0.04818	0.442	0.1898	0.00261762	0.0465	0.4216	0.2434	0.0003875	6.13e-06		Genotyped	0.2106	0.6376	0.1067	2.47e-05		6.3e-10	0.1111	0.545
6	32273060	rs522254	C6orf10	intron	NA	NA	G	A	Imputed	0.04888	0.4286	0.1896	0.0020695	0.04659	0.4206	0.2433	0.0003728	4.55e-06		Imputed	0.2101	0.6427	0.1067	3.41e-05		6.54e-10	0.0805	0.603
6	32282854	rs6910071	C6orf10	intron	NA	NA	G	A	Genotyped	0.04888	0.4286	0.1896	0.0020695	0.0465	0.4216	0.2434	0.0003875	4.67e-06		Genotyped	0.2107	0.6438	0.1064	3.5e-05		6.91e-10	0.0794	0.605
6	32303848	rs28361060	C6orf10	intron	NA	NA	A	G	Imputed	0.04888	0.4286	0.1896	0.0020695	0.0465	0.4216	0.2434	0.0003875	4.67e-06		Imputed	0.2106	0.6445	0.1064	3.65e-05		7.19e-10	0.0783	0.607
6	32333341	rs9268362	C6orf10	intron	NA	NA	G	A	Genotyped	0.04888	0.4286	0.1896	0.0020695	0.0465	0.4216	0.2434	0.0003875	4.67e-06		Genotyped	0.2111	0.6421	0.1064	3.14e-05		6.18e-10	0.082	0.6
6	32339897	rs2050188	C6orf10	near-gene-5	NA	NA	T	C	Genotyped	0.4923	0.730994	0.07045	0.00442651	0.4915	0.7655	0.09499	0.004897	7.58e-05		Genotyped	0.6543	0.69979	0.07862	5.62e-06		1.96e-09	0.765	0
6	32340106	rs2281276	C6orf10	near-gene-5	NA	NA	NA	NA	Imputed	NA	NA	NA	NA	NA	NA	NA	NA	NA		Imputed	0.4399	1.5873	0.08168	1.54e-08		NA	NA	NA
6	32345595	rs2395153	C6orf10	intergenic	NA	NA	G	C	Genotyped	0.2291	0.745	0.08696	0.00359182	0.224	0.721	0.1125	0.003638	4.78e-05		Genotyped	0.3953	0.6792	0.08158	2.12e-06		5.01e-10	0.7341	0
6	32358942	rs9268476	BTNL2	intergenic	NA	NA	A	T	Imputed	0.2902	0.7617	0.07787	0.0401691	0.2916	0.7364	0.1026	0.002855	0.0006385		Imputed	0.4227	0.692	0.0802	4.44e-06		1.66e-08	0.6876	0
6	32367795	rs2294878	BTNL2	intron	NA	NA	T	G	Genotyped	0.294	0.7626	0.07802	0.0314629	0.297	0.7238	0.1028	0.001668	0.0003307		Genotyped	0.4507	0.6732	0.07836	4.43e-07		1.13e-09	0.5276	0
6	32375745	rs6926737	BTNL2	near-gene-5	NA	NA	G	A	Genotyped	0.4001	1.3	0.07087	0.0406078	0.405	1.191	0.0944	0.06427	0.006061		Genotyped	0.4899	1.484	0.07701	2.96e-07		3.1e-08	0.1746	0.427
6	32376618	rs3763314	BTNL2	near-gene-5	NA	NA	C	T	Genotyped	0.4029	1.286	0.07079	0.0521719	0.405	1.2	0.09421	0.05333	0.006785		Genotyped	0.4899	1.485	0.07703	2.86e-07		3.52e-08	0.1768	0.423
6	32376882	rs9268501	BTNL2	near-gene-5	NA	NA	T	G	Genotyped	0.4204	1.28	0.07025	0.0248057	0.42	1.18	0.09432	0.08002	0.004443		Genotyped	0.4899	1.486	0.07709	2.82e-07		1.97e-08	0.1378	0.495
6	32376932	rs9268502	BTNL2	intergenic	NA	NA	C	T	Genotyped	0.4197	1.272	0.07034	0.0260605	0.421	1.191	0.09409	0.06269	0.003795		Genotyped	0.4899	1.486	0.07709	2.82e-07		1.6e-08	0.1472	0.478
6	32377061	rs9268503	BTNL2	intergenic	NA	NA	C	T	Imputed	0.4197	1.272	0.07034	0.0260605	0.4198	1.177	0.09438	0.08364	0.004844		Imputed	0.4899	1.486	0.07715	2.79e-07		2.2e-08	0.1281	0.513
6	32377116	rs9268504	BTNL2	intergenic	NA	NA	C	G	Genotyped	0.4197	1.272	0.07034	0.0260605	0.42	1.18	0.09432	0.08002	0.004663		Genotyped	0.4899	1.486	0.07709	2.82e-07		2.1e-08	0.1319	0.506
6	32377470	rs9268506	BTNL2	intergenic	NA	NA	C	T	Genotyped	0.4197	1.272	0.07034	0.0260605	0.4215	1.186	0.09415	0.06953	0.004139		Genotyped	0.4894	1.465	0.07697	7.05e-07		3.62e-08	0.1831	0.411
6	32377539	rs9268507	BTNL2	intergenic	NA	NA	A	G	Genotyped	0.4197	1.272	0.07034	0.0260605	0.421	1.191	0.09409	0.06269	0.003795		Genotyped	0.4894	1.465	0.07697	7.05e-07		3.23e-08	0.192	0.394
6	32377588	rs9268508	BTNL2	intergenic	NA	NA	T	A	Imputed	0.4197	1.272	0.07034	0.0260605	0.421	1.191	0.09409	0.06269	0.003795		Imputed	0.4894	1.466	0.07704	6.96e-07		3.2e-08	0.19	0.398
6	32378787	rs9268513	BTNL2	intergenic	NA	NA	T	C	Genotyped	0.4197	1.272	0.07034	0.0260605	0.421	1.191	0.09409	0.06269	0.003795		Genotyped	0.4895	1.463	0.07693	7.61e-07		3.43e-08	0.1966	0.385
6	32378834	rs5007266	BTNL2	intergenic	NA	NA	T	C	Genotyped	0.4197	1.272	0.07034	0.0260605	0.421	1.191	0.09409	0.06269	0.003795		Genotyped	0.4894	1.465	0.07697	7.05e-07		3.23e-08	0.192	0.394
6	32378866	rs5007265	BTNL2	intergenic	NA	NA	T	G	Genotyped	0.4197	1.272	0.07034	0.0260605	0.421	1.191	0.09409	0.06269	0.003795		Genotyped	0.4894	1.465	0.07697	7.05e-07		3.23e-08	0.192	0.394
6	32378877	rs5007264	BTNL2	intergenic	NA	NA	C	T	Genotyped	0.4197	1.272	0.07034	0.0260605	0.421	1.191	0.09409	0.06269	0.003795		Genotyped	0.4894	1.465	0.07697	7.05e-07		3.23e-08	0.192	0.394
6	32378982	rs5007263	BTNL2	intergenic	NA	NA	A	G	Genotyped	0.4197	1.272	0.07034	0.0260605	0.421	1.191	0.09409	0.06269	0.003795		Genotyped	0.4894	1.465	0.07697	7.05e-07		3.23e-08	0.192	0.394
6	32379011	rs5007262	BTNL2	intergenic	NA	NA	A	G	Genotyped	0.4197	1.272	0.07034	0.0260605	0.4215	1.186	0.09394	0.0699	0.004158		Genotyped	0.4894	1.465	0.07697	7.05e-07		3.64e-08	0.1826	0.412
6	32379031	rs5007261	BTNL2	intergenic	NA	NA	G	A	Genotyped	0.4197	1.272	0.07034	0.0260605	0.421	1.191	0.09409	0.06269	0.003795		Genotyped	0.4894	1.465	0.07697	7.05e-07		3.23e-08	0.192	0.394
6	32379047	rs5007260	BTNL2	intergenic	NA	NA	G	A	Genotyped	0.4197	1.272	0.07034	0.0260605	0.421	1.191	0.09409	0.06269	0.003795		Genotyped	0.4895	1.46	0.07688	8.47e-07		3.72e-08	0.2037	0.372
6	32379101	rs5007259	BTNL2	intergenic	NA	NA	T	C	Genotyped	0.4197	1.272	0.07034	0.0260605	0.421	1.191	0.09409	0.06269	0.003795		Genotyped	0.4894	1.465	0.07697	7.05e-07		3.23e-08	0.192	0.394
6	32379239	rs5007258	BTNL2	intergenic	NA	NA	A	G	Genotyped	0.4197	1.272	0.07034	0.0260605	0.421	1.191	0.09409	0.06269	0.003795		Genotyped	0.4895	1.471	0.07696	5.33e-07		2.61e-08	0.1781	0.42
6	32379445	rs6906730	BTNL2	intergenic	NA	NA	T	C	Genotyped	0.4197	1.272	0.07034	0.0260605	0.421	1.191	0.09409	0.06269	0.003795		Genotyped	0.4894	1.465	0.07697	7.05e-07		3.23e-08	0.192	0.394
6	32379682	rs6911383	BTNL2	intergenic	NA	NA	T	C	Genotyped	0.4197	1.272	0.07034	0.0260605	0.421	1.191	0.09409	0.06269	0.003795		Genotyped	0.4894	1.465	0.07697	7.05e-07		3.23e-08	0.192	0.394
6	32380190	rs6932810	BTNL2	intergenic	NA	NA	G	A	Genotyped	0.4197	1.272	0.07034	0.0260605	0.421	1.191	0.09409	0.06269	0.003795		Genotyped	0.4894	1.465	0.07697	7.05e-07		3.23e-08	0.192	0.394
6	32380262	rs6932542	BTNL2	intergenic	NA	NA	A	G	Genotyped	0.4197	1.272	0.07029	0.0238991	0.421	1.191	0.09409	0.06269	0.003481		Genotyped	0.4894	1.465	0.07697	7.05e-07		2.89e-08	0.1919	0.394
6	32380715	rs968155	BTNL2	intergenic	NA	NA	C	T	Imputed	0.4544	1.263	0.06888	0.0134025	0.4719	1.179	0.09168	0.07191	0.002225		Imputed	0.4765	1.457	0.07754	1.2e-06		2.54e-08	0.1764	0.424
6	32380782	rs4502931	BTNL2	intergenic	NA	NA	T	A	Genotyped	0.4197	1.272	0.07034	0.0260605	0.421	1.191	0.09409	0.06269	0.003795		Genotyped	0.4894	1.465	0.07697	7.05e-07		3.23e-08	0.192	0.394
6	32380785	rs968154	BTNL2	intergenic	NA	NA	G	A	Imputed	0.4197	1.272	0.07034	0.0260605	0.421	1.191	0.09409	0.06269	0.003795		Imputed	0.4894	1.465	0.07697	7.05e-07		3.23e-08	0.192	0.394
6	32380818	rs9268518	BTNL2	intergenic	NA	NA	A	G	Imputed	0.4197	1.272	0.07034	0.0260605	0.421	1.191	0.09409	0.06269	0.003795		Imputed	0.4853	1.465	0.07762	8.79e-07		3.96e-08	0.1951	0.388
6	32380826	rs9268519	BTNL2	intergenic	NA	NA	G	A	Imputed	0.4197	1.272	0.07034	0.0260605	0.4209	1.192	0.09408	0.06172	0.003747		Imputed	0.4853	1.465	0.07762	8.79e-07		3.89e-08	0.197	0.385
6	32380860	rs9268520	BTNL2	intergenic	NA	NA	C	A	Imputed	0.4197	1.272	0.07034	0.0260605	0.4209	1.192	0.09408	0.06172	0.003747		Imputed	0.4853	1.465	0.07762	8.79e-07		3.89e-08	0.197	0.385
6	32381041	rs6938337	BTNL2	intergenic	NA	NA	C	G	Genotyped	0.4197	1.272	0.07034	0.0260605	0.4205	1.196	0.09403	0.05727	0.003521		Genotyped	0.4894	1.465	0.07697	7.05e-07		2.94e-08	0.201	0.377
6	32381210	rs6918317	BTNL2	intergenic	NA	NA	T	C	Genotyped	0.419	1.266	0.07041	0.0298983	0.42	1.2	0.09396	0.05221	0.003752		Genotyped	0.4769	1.475	0.07689	4.37e-07		2.21e-08	0.1768	0.423
6	32381736	rs7759742	BTNL2	intergenic	NA	NA	T	A	Genotyped	0.4197	1.263	0.07041	0.0367449	0.4185	1.193	0.09393	0.0597	0.005159		Genotyped	0.4868	1.486	0.07703	2.68e-07		2.32e-08	0.141	0.489
6	32392661	rs2157332	HLA-DRA	intergenic	NA	NA	T	C	Imputed	0.2625	0.5949	0.08427	2.08e-06	0.2505	0.7201	0.1092	0.002623	2.06e-08		Imputed	0.3899	0.9586	0.07818	0.5888		1.14e-05	0.0002	0.886
6	32395568	rs2187818	HLA-DRA	intergenic	NA	NA	T	G	Genotyped	0.2633	0.6185	0.08305	6.6e-06	0.2515	0.713	0.1087	0.001859	4.39e-08		Genotyped	0.3901	0.9573	0.07815	0.5769		1.53e-05	0.0005	0.868
6	32396057	rs9268578	HLA-DRA	intergenic	NA	NA	G	A	Genotyped	0.2633	0.6185	0.08305	6.6e-06	0.2515	0.713	0.1087	0.001859	4.39e-08		Genotyped	0.3892	0.9616	0.07835	0.6176		1.84e-05	0.0004	0.871
6	32396450	rs9268579	HLA-DRA	intergenic	NA	NA	A	G	Genotyped	0.2633	0.6185	0.08305	6.6e-06	0.2515	0.713	0.1087	0.001859	4.39e-08		Genotyped	0.3901	0.9573	0.07815	0.5769		1.53e-05	0.0005	0.868
6	32396964	rs9268582	HLA-DRA	intergenic	NA	NA	T	C	Imputed	0.2723	0.6265	0.08177	3.39e-06	0.2583	0.7132	0.1081	0.001768	2.19e-08		Imputed	0.3904	0.9527	0.07829	0.5363		8.46e-06	0.0008	0.86
6	32397266	rs9268583	HLA-DRA	intergenic	NA	NA	G	T	Genotyped	0.2633	0.6185	0.08305	6.6e-06	0.2515	0.713	0.1087	0.001859	4.39e-08		Genotyped	0.3901	0.9573	0.07815	0.5769		1.53e-05	0.0005	0.868
6	32397309	rs3129849	HLA-DRA	intergenic	NA	NA	A	G	Imputed	0.1844	1.52	0.08343	1.57e-05	0.215	1.466	0.1139	0.0007816	4.53e-08		Imputed	0.1857	1.273	0.09456	0.01061		1.14e-08	0.3536	0.038
6	32397403	rs9268585	HLA-DRA	intergenic	NA	NA	G	T	Genotyped	0.2633	0.6185	0.08305	6.6e-06	0.2515	0.713	0.1087	0.001859	4.39e-08		Genotyped	0.3901	0.9573	0.07815	0.5769		1.53e-05	0.0005	0.868
6	32397784	rs3129852	HLA-DRA	intergenic	NA	NA	G	A	Genotyped	0.1844	1.52	0.08343	1.57e-05	0.215	1.466	0.1139	0.0007816	4.53e-08		Genotyped	0.1858	1.272	0.09457	0.01087		1.18e-08	0.3502	0.047
6	32398748	rs3135341	HLA-DRA	intergenic	NA	NA	C	A	Imputed	0.1844	1.52	0.08343	1.57e-05	0.215	1.466	0.1139	0.0007816	4.53e-08		Imputed	0.1855	1.276	0.09456	0.009907		1.03e-08	0.3638	0.011
6	32399159	rs4504509	HLA-DRA	intergenic	NA	NA	T	C	Imputed	0.1844	1.52	0.08347	1.56e-05	0.215	1.466	0.1139	0.0007816	4.52e-08		Imputed	0.1855	1.276	0.09456	0.009907		1.03e-08	0.3639	0.011
6	32401889	rs17202745	HLA-DRA	intergenic	NA	NA	A	G	Imputed	0.1232	1.692	0.09805	2.97e-05	0.1481	1.646	0.1337	0.0001924	2.55e-08		Imputed	0.0112	0.9604	0.3556	0.9096		9.29e-05	0.3068	0.154
6	32402686	rs3135334	HLA-DRA	intergenic	NA	NA	C	T	Genotyped	0.1837	1.534	0.08345	1.31e-05	0.215	1.466	0.1139	0.0007816	3.78e-08		Genotyped	0.1858	1.272	0.09457	0.01087		1.03e-08	0.3191	0.125
6	32406473	rs9268633	HLA-DRA	near-gene-5	NA	NA	A	G	Genotyped	0.1844	1.542	0.08346	8.65e-06	0.215	1.466	0.1139	0.0007816	2.5e-08		Genotyped	0.1858	1.272	0.09457	0.01087		7.58e-09	0.3017	0.165
6	32406704	rs3763321	HLA-DRA	near-gene-5	NA	NA	T	G	Imputed	0.1858	1.554	0.08377	1.16e-05	0.2146	1.465	0.1144	0.0008396	3.59e-08		Imputed	0.1998	1.219	0.09384	0.03462		5.05e-08	0.1448	0.483
6	32408917	rs3129880	HLA-DRA	intron	NA	NA	T	C	Imputed	0.1823	1.562	0.08334	3.01e-06	0.2156	1.396	0.114	0.003446	3.87e-08		Imputed	0.2005	1.214	0.09401	0.03915		7.23e-08	0.1336	0.503
6	32409305	rs6926374	HLA-DRA	intron	NA	NA	G	A	Genotyped	0.5021	0.671592	0.0701	1.11e-08	0.467	0.7271	0.0921	0.0005405	2.84e-11		Genotyped	0.471	0.9105	0.0763	0.2193		1.71e-08	0.0114	0.777
6	32409781	rs6931646	HLA-DRA	intron	NA	NA	T	C	Genotyped	0.5021	0.671592	0.0701	1.11e-08	0.4665	0.7306	0.09199	0.0006435	3.43e-11		Genotyped	0.471	0.9105	0.0763	0.2193		1.93e-08	0.0117	0.775
6	32409787	rs6911419	HLA-DRA	intron	NA	NA	C	T	Genotyped	0.5021	0.671592	0.0701	1.11e-08	0.467	0.7271	0.0921	0.0005405	2.84e-11		Genotyped	0.471	0.9105	0.0763	0.2193		1.71e-08	0.0114	0.777
6	32410137	rs3129883	HLA-DRA	intron	NA	NA	T	C	Genotyped	0.2793	1.944	0.07465	7.01e-07	0.306	1.309	0.09639	0.005252	1.57e-08		Genotyped	0.2417	1.203	0.08718	0.03422		3.09e-08	3.62526e-05	0.902
6	32410576	rs3129886	HLA-DRA	intron	NA	NA	T	C	Genotyped	0.2793	1.944	0.07465	7.01e-07	0.306	1.309	0.09639	0.005252	1.57e-08		Genotyped	0.2417	1.203	0.08718	0.03422		3.09e-08	3.62526e-05	0.902
6	32410716	rs9268658	HLA-DRA	intron	NA	NA	A	G	Genotyped	0.5021	0.671592	0.0701	1.11e-08	0.467	0.7271	0.0921	0.0005405	2.84e-11		Genotyped	0.471	0.9105	0.0763	0.2193		1.71e-08	0.0114	0.777
6	32410941	rs9268659	HLA-DRA	intron	NA	NA	T	C	Genotyped	0.4302	1.616	0.07119	2.18e-08	0.4525	1.389	0.09258	0.0003815	3.69e-11		Genotyped	0.4268	1.283	0.07686	0.001206		2.43e-12	0.0809	0.602
6	32411035	rs8084	HLA-DRA	coding-synonymous	NA	134/255	A	C	Genotyped	0.4302	1.616	0.07119	2.18e-08	0.4525	1.389	0.09258	0.0003815	3.69e-11		Genotyped	0.4268	1.283	0.07686	0.001206		2.43e-12	0.0809	0.602
6	32411523	rs2239804	HLA-DRA	intron	NA	NA	C	T	Genotyped	0.5021	0.671592	0.0701	1.11e-08	0.4675	0.7303	0.09215	0.0006466	3.45e-11		Genotyped	0.471	0.9105	0.0763	0.2193		1.93e-08	0.0117	0.775
6	32411646	rs7192	HLA-DRA	missense	LEU,VAL	242/255	T	G	Genotyped	0.4239	1.656	0.07147	8.73e-09	0.445	1.396	0.09311	0.0003438	1.4e-11		Genotyped	0.3949	1.35	0.07824	0.0001255		5.28e-14	0.1197	0.529
6	32411726	rs3129888	HLA-DRA	intron	NA	NA	G	A	Genotyped	0.2074	1.595	0.08001	6.02e-05	0.229	1.404	0.11	0.002021	4.18e-07		Genotyped	0.1937	1.365	0.09392	0.0009203		2.82e-09	0.3992	0
6	32411833	rs2239803	HLA-DRA	intron	NA	NA	T	C	Genotyped	0.5084	0.652742	0.07017	1.68e-08	0.4845	0.7059	0.09226	0.0001596	1.18e-11		Genotyped	0.4795	0.9116	0.07647	0.2264		1.08e-08	0.0044	0.816
6	32411846	rs2239802	HLA-DRA	intron	NA	NA	C	G	Genotyped	0.2751	2.005	0.07514	2.69e-07	0.3	1.323	0.09697	0.00394	4.76e-09		Genotyped	0.2098	1.301	0.09138	0.003964		5.22e-10	0.0001	0.888
6	32412395	rs3135390	HLA-DRA	intron	NA	NA	C	A	Imputed	0.2067	1.614	0.08016	5.02e-05	0.229	1.404	0.11	0.002021	3.48e-07		Imputed	0.1933	1.368	0.09388	0.0008389		2.16e-09	0.3497	0.048
6	32412398	rs4935354	HLA-DRA	intron	NA	NA	C	T	Genotyped	0.4239	1.656	0.07147	8.73e-09	0.445	1.396	0.09311	0.0003438	1.4e-11		Imputed	0.3949	1.35	0.07824	0.0001255		5.28e-14	0.1197	0.529
6	32412480	rs7194	HLA-DRA	utr-3	NA	NA	G	A	Imputed	0.4239	1.656	0.07147	8.73e-09	0.445	1.396	0.09311	0.0003438	1.4e-11		Imputed	0.3949	1.35	0.07824	0.000126		5.28e-14	0.1197	0.529
6	32412539	rs7195	HLA-DRA	utr-3	NA	NA	A	G	Genotyped	0.4239	1.656	0.07147	8.73e-09	0.445	1.396	0.09311	0.0003438	1.4e-11		Genotyped	0.3949	1.35	0.07824	0.0001255		5.28e-14	0.1197	0.529
6	32412571	rs7196	HLA-DRA	utr-3	NA	NA	A	T	Genotyped	0.273	2.003	0.07503	2.83e-07	0.2985	1.317	0.09734	0.004704	6.1e-09		Genotyped	0.2098	1.301	0.09138	0.003964		6.3e-10	0.0001	0.889
6	32412580	rs7197	HLA-DRA	utr-3	NA	NA	T	C	Genotyped	0.1802	1.61	0.08411	2.96e-06	0.209	1.416	0.1153	0.002564	2.81e-08		Genotyped	0.1684	1.333	0.09957	0.003882		1.98e-09	0.3262	0.107
6	32413094	rs2213586	HLA-DRA	near-gene-3	NA	NA	A	G	Genotyped	0.4239	1.656	0.07147	8.73e-09	0.445	1.396	0.09311	0.0003438	1.4e-11		Genotyped	0.3949	1.35	0.07824	0.0001255		5.28e-14	0.1197	0.529
6	32413150	rs2213585	HLA-DRA	near-gene-3	NA	NA	G	A	Genotyped	0.4239	1.656	0.07147	8.73e-09	0.445	1.396	0.09311	0.0003438	1.4e-11		Genotyped	0.3949	1.35	0.07824	0.0001255		5.28e-14	0.1197	0.529
6	32413259	rs2213584	HLA-DRA	near-gene-3	NA	NA	A	G	Genotyped	0.4239	1.656	0.07147	8.73e-09	0.445	1.396	0.09311	0.0003438	1.4e-11		Genotyped	0.3949	1.35	0.07824	0.0001255		5.28e-14	0.1197	0.529
6	32413317	rs2395182	HLA-DRA	near-gene-3	NA	NA	G	T	Imputed	0.273	2	0.07503	3.03e-07	0.2985	1.317	0.09734	0.004704	6.48e-09		Imputed	0.2097	1.305	0.09139	0.003589		5.74e-10	0.0001	0.887
6	32413459	rs2227139	HLA-DRA	near-gene-3	NA	NA	G	A	Genotyped	0.4239	1.656	0.07147	8.73e-09	0.446	1.408	0.09295	0.0002302	9.15e-12		Genotyped	0.3949	1.35	0.07824	0.0001255		3.77e-14	0.1264	0.517
6	32413830	rs3763327	HLA-DRA	near-gene-3	NA	NA	G	C	Genotyped	0.4239	1.656	0.07147	8.73e-09	0.4445	1.4	0.09305	0.0003002	1.21e-11		Imputed	0.3945	1.353	0.07824	0.0001119		4.04e-14	0.1261	0.517
6	32413889	rs9268668	HLA-DRA	near-gene-3	NA	NA	C	A	Genotyped	0.3729	1.543	0.07154	6.55e-08	0.388	1.421	0.09513	0.00022	6.04e-11		Genotyped	0.3844	1.35	0.07814	0.0001229		1.66e-13	0.4427	0
6	32414273	rs3129890	HLA-DRA	near-gene-3	NA	NA	C	T	Genotyped	0.382	1.651	0.07174	1.51e-07	0.406	1.421	0.09391	0.0001814	1.13e-10		Genotyped	0.2584	1.098	0.08776	0.288		7.66e-08	0.0015	0.846
6	32414287	rs9268670	HLA-DRA	near-gene-3	NA	NA	C	T	Imputed	0.4874	0.633312	0.07143	8.04e-07	0.451	0.8227	0.09307	0.03597	1.76e-07		Imputed	0.5928	0.739098	0.0781	0.00011		1.17e-10	0.0697	0.625
6	32415522	rs9268686	HLA-DRA	intergenic	NA	NA	T	C	Imputed	0.4888	0.631712	0.07166	3.91e-07	0.4498	0.831	0.09332	0.04735	1.38e-07		Imputed	0.593	0.739098	0.07825	0.0001119		9.66e-11	0.0562	0.653
6	32420179	rs7754768	HLA-DRA	intergenic	NA	NA	T	C	Genotyped	0.4777	0.635324	0.07143	3.55e-06	0.451	0.8227	0.09307	0.03597	6.29e-07		Genotyped	0.5926	0.739645	0.07815	0.0001127		3.71e-10	0.0746	0.615
6	32420238	rs7775108	HLA-DRA	intergenic	NA	NA	C	T	Genotyped	0.4777	0.635324	0.07143	3.55e-06	0.451	0.8227	0.09307	0.03597	6.29e-07		Imputed	0.5926	0.739645	0.07815	0.0001127		3.71e-10	0.0746	0.615
6	32424108	rs7776297	HLA-DRA	intergenic	NA	NA	T	C	Genotyped	0.2291	2.128	0.07884	2.1e-06	0.257	1.339	0.101	0.003899	3.14e-08		Genotyped	0.07263	0.9276	0.1484	0.6124		0.000287	3.66232e-07	0.933
6	32424677	rs9268815	HLA-DRA	intergenic	NA	NA	T	A	Imputed	0.4859	0.629723	0.07161	5.23e-07	0.451	0.8229	0.09305	0.03624	1.24e-07		Imputed	0.5924	0.740192	0.07815	0.0001192		9.5e-11	0.0606	0.643
6	32424888	rs115080784	HLA-DRA	intergenic	NA	NA	T	C	Imputed	0.1261	1.731	0.09697	9.75e-06	0.1531	1.687	0.131	6.5e-05	3.09e-09		Imputed	0.01102	0.8644	0.3712	0.6947		6.87e-05	0.1931	0.392
6	32425135	rs7743415	HLA-DRA	intergenic	NA	NA	T	C	Imputed	0.4888	0.629327	0.07157	3.25e-07	0.4509	0.8226	0.09307	0.03591	8.17e-08		Imputed	0.5925	0.740192	0.07826	0.0001214		6.7e-11	0.0601	0.644
6	32426458	rs7769693	HLA-DRA	intergenic	NA	NA	G	T	Imputed	0.4888	0.625	0.07177	2.07e-07	0.4503	0.8178	0.09323	0.03094	4.6e-08		Imputed	0.5923	0.734214	0.07843	8.25e-05		2.63e-11	0.0602	0.644
6	32428772	rs9268839	HLA-DRA	intergenic	NA	NA	G	A	Genotyped	0.264	0.6354	0.08527	1.08e-05	0.2385	0.7767	0.1071	0.01831	7.57e-07		Genotyped	0.4318	0.6428	0.08118	5.19e-08		2.13e-13	0.2795	0.216
6	32443172	rs9391879	HLA-DRB5	intergenic	NA	NA	T	C	Imputed	0.2696	0.6351	0.08505	1.76e-05	0.2405	0.7906	0.1066	0.02756	1.87e-06		Imputed	0.4305	0.6391	0.08127	3.61e-08		3.97e-13	0.2076	0.364
6	32443432	rs9391881	HLA-DRB5	intergenic	NA	NA	G	C	Imputed	0.2696	0.6351	0.08505	1.76e-05	0.2405	0.7906	0.1066	0.02756	1.87e-06		Imputed	0.4305	0.6391	0.08127	3.61e-08		3.97e-13	0.2076	0.364
6	32443451	rs9378264	HLA-DRB5	intergenic	NA	NA	A	G	Imputed	0.2692	0.6351	0.08505	1.92e-05	0.2402	0.7887	0.1067	0.02607	1.89e-06		Imputed	0.4294	0.6341	0.0817	2.48e-08		2.88e-13	0.2037	0.371
6	32443665	rs28895241	HLA-DRB5	intergenic	NA	NA	C	T	Imputed	0.2635	0.6161	0.08654	2.4e-05	0.2396	0.7955	0.1073	0.033	3.04e-06		Imputed	0.4211	0.6361	0.08298	4.98e-08		9.07e-13	0.1458	0.481
6	32443666	rs28895242	HLA-DRB5	intergenic	NA	NA	C	G	Imputed	0.2632	0.6226	0.08637	2.1e-05	0.2387	0.8007	0.107	0.0377	3.15e-06		Imputed	0.42	0.6395	0.08299	7.15e-08		1.32e-12	0.149	0.475
6	32444096	rs28732244	HLA-DRB5	intergenic	NA	NA	T	C	Imputed	0.2656	0.6428	0.08569	2.52e-05	0.2374	0.8079	0.1071	0.04629	4.71e-06		Imputed	0.4225	0.6541	0.0818	2.1e-07		5.34e-12	0.198	0.383
6	32444198	rs12194148	HLA-DRB5	intergenic	NA	NA	T	G	Imputed	0.2696	0.6351	0.08505	1.76e-05	0.2405	0.7906	0.1066	0.02756	1.87e-06		Imputed	0.4305	0.6391	0.08127	3.61e-08		3.97e-13	0.2076	0.364
6	32444330	rs12207473	HLA-DRB5	intergenic	NA	NA	C	A	Imputed	0.2659	NA	0.08505	3.87e-05	0.2376	0.8073	0.107	0.04542	6.64e-06		Imputed	0.4291	1.56642	0.08135	3.45e-08		1.51e-12	5.23575e-06	0.918
6	32444584	rs12195589	HLA-DRB5	intergenic	NA	NA	T	C	Imputed	0.2696	0.6351	0.08505	1.76e-05	0.2405	0.7906	0.1066	0.02756	1.87e-06		Imputed	0.4305	0.6391	0.08127	3.61e-08		3.97e-13	0.2076	0.364
6	32445079	rs28895255	HLA-DRB5	intergenic	NA	NA	T	C	Imputed	0.2696	0.6351	0.08505	1.76e-05	0.2405	0.7906	0.1066	0.02756	1.87e-06		Imputed	0.4303	0.6395	0.08129	3.79e-08		4.15e-13	0.2086	0.362
6	32445114	rs28895257	HLA-DRB5	intergenic	NA	NA	G	A	Imputed	0.2696	0.6351	0.08505	1.76e-05	0.2405	0.7906	0.1066	0.02756	1.87e-06		Imputed	0.4303	0.6395	0.08129	3.79e-08		4.15e-13	0.2086	0.362
6	32445117	rs28895258	HLA-DRB5	intergenic	NA	NA	T	C	Imputed	0.2696	0.6351	0.08505	1.76e-05	0.2405	0.7906	0.1066	0.02756	1.87e-06		Imputed	0.4303	0.6395	0.08129	3.79e-08		4.15e-13	0.2086	0.362
6	32445306	rs28895261	HLA-DRB5	intergenic	NA	NA	A	G	Imputed	0.25	0.6731	0.08789	0.000190725	0.2263	0.8195	0.1105	0.07158	4.57e-05		Imputed	0.422	0.6486	0.08225	1.41e-07		4.38e-11	0.2165	0.346
6	32445691	rs9378212	HLA-DRB5	intergenic	NA	NA	T	C	Genotyped	0.2696	0.6351	0.08505	1.76e-05	0.2405	0.7906	0.1066	0.02756	1.87e-06		Genotyped	0.4305	0.6391	0.08127	3.61e-08		3.97e-13	0.2076	0.364
6	32445792	rs28895264	HLA-DRB5	intergenic	NA	NA	T	C	Imputed	0.2652	0.6449	0.08546	3.34e-05	0.2372	0.8082	0.1071	0.04683	6.09e-06		Imputed	0.423	0.6557	0.08184	2.49e-07		8.2e-12	0.2052	0.369
6	32445992	rs17209866	HLA-DRB5	intergenic	NA	NA	A	G	Imputed	0.2642	0.6424	0.08578	3.26e-05	0.2356	0.7775	0.1086	0.02045	2.33e-06		Imputed	0.4277	0.6437	0.0816	6.74e-08		8.84e-13	0.3078	0.151
6	32446051	rs17209887	HLA-DRB5	intergenic	NA	NA	C	A	Imputed	0.2625	0.6513	0.0853	4.94e-05	0.2356	0.8046	0.1076	0.04338	7.82e-06		Imputed	0.427	0.6416	0.08163	5.45e-08		2.7e-12	0.2011	0.377
6	32446071	rs17203514	HLA-DRB5	intergenic	NA	NA	G	C	Imputed	0.2696	0.6351	0.08505	1.76e-05	0.2405	0.7906	0.1066	0.02756	1.87e-06		Imputed	0.4305	0.6392	0.08126	3.65e-08		4.01e-13	0.2079	0.363
6	32446307	rs17203549	HLA-DRB5	intergenic	NA	NA	NA	NA	Imputed	NA	NA	NA	NA	NA	NA	NA	NA	NA		Imputed	0.4305	1.56446	0.08126	3.65e-08		NA	NA	NA
6	32446459	rs17203563	HLA-DRB5	intergenic	NA	NA	A	G	Imputed	0.2649	NA	0.08513	5.53e-05	0.2376	0.8073	0.107	0.04542	9.1e-06		Imputed	0.4284	1.56104	0.08136	4.4e-08		2.65e-12	5.93288e-06	0.917
6	32446853	rs17203612	HLA-DRB5	intergenic	NA	NA	T	A	Imputed	0.2696	0.6389	0.08512	2.66e-05	0.2427	0.7859	0.1069	0.02421	2.33e-06		Imputed	0.4373	0.6285	0.08251	1.82e-08		2.8e-13	0.2092	0.361
6	32447014	rs17203636	HLA-DRB5	intergenic	NA	NA	A	G	Imputed	0.2696	0.6351	0.08505	1.76e-05	0.2405	0.7906	0.1066	0.02756	1.87e-06		Imputed	0.4305	0.6392	0.08126	3.65e-08		4.01e-13	0.2079	0.363
6	32447111	rs29001652	HLA-DRB5	intergenic	NA	NA	G	A	Imputed	0.2716	0.6202	0.08545	1.22e-05	0.2414	0.8025	0.107	0.03982	2.07e-06		Imputed	0.4305	0.6392	0.08126	3.65e-08		4.42e-13	0.1362	0.498
6	32447162	rs29001478	HLA-DRB5	intergenic	NA	NA	A	G	Imputed	0.2696	0.6351	0.08504	1.89e-05	0.2405	0.7906	0.1066	0.02756	1.99e-06		Imputed	0.4305	0.6392	0.08126	3.65e-08		4.29e-13	0.2078	0.363
6	32447216	rs29001620	HLA-DRB5	intergenic	NA	NA	T	A	Imputed	0.2716	0.6202	0.08544	1.31e-05	0.2414	0.8025	0.107	0.03982	2.21e-06		Imputed	0.4305	0.6392	0.08126	3.65e-08		4.73e-13	0.1362	0.498
6	32447219	rs28732246	HLA-DRB5	intergenic	NA	NA	A	G	Imputed	0.2716	0.6202	0.08544	1.31e-05	0.2414	0.8025	0.107	0.03982	2.21e-06		Imputed	0.4305	0.6392	0.08126	3.65e-08		4.73e-13	0.1362	0.498
6	32447341	rs29001568	HLA-DRB5	intergenic	NA	NA	A	G	Imputed	0.2696	0.6351	0.08504	1.89e-05	0.2405	0.7906	0.1066	0.02756	1.99e-06		Imputed	0.4305	0.6392	0.08126	3.65e-08		4.29e-13	0.2078	0.363
6	32447518	rs35007143	HLA-DRB5	intergenic	NA	NA	A	T	Imputed	0.2692	0.6332	0.08512	1.8e-05	0.2397	0.7923	0.1067	0.02904	2.02e-06		Imputed	0.4152	0.6475	0.0823	1.29e-07		1.41e-12	0.2152	0.349
6	32447715	rs4994859	HLA-DRB5	intergenic	NA	NA	G	A	Imputed	0.2696	0.6351	0.08504	1.89e-05	0.2405	0.7906	0.1066	0.02756	1.99e-06		Imputed	0.4305	0.6392	0.08126	3.65e-08		4.29e-13	0.2078	0.363
6	32447873	rs71543448	HLA-DRB5	intergenic	NA	NA	G	A	Imputed	0.2696	0.6351	0.08504	1.89e-05	0.2405	0.7906	0.1066	0.02756	1.99e-06		Imputed	0.4305	0.6391	0.08127	3.61e-08		4.24e-13	0.2076	0.364
6	32447900	rs4994854	HLA-DRB5	intergenic	NA	NA	C	T	Imputed	0.2696	0.6351	0.08504	1.89e-05	0.2405	0.7906	0.1066	0.02756	1.99e-06		Imputed	0.4305	0.6391	0.08127	3.61e-08		4.24e-13	0.2076	0.364
6	32448398	rs9378213	HLA-DRB5	intergenic	NA	NA	G	T	Genotyped	0.2696	0.6351	0.08505	1.76e-05	0.2405	0.7906	0.1066	0.02756	1.87e-06		Genotyped	0.4296	0.6426	0.08145	5.63e-08		5.94e-13	0.2158	0.348
6	32449138	rs9394098	HLA-DRB5	intergenic	NA	NA	T	C	Imputed	0.2692	0.6351	0.08505	1.93e-05	0.2405	0.7906	0.1066	0.02756	2.03e-06		Imputed	0.4302	0.6402	0.08123	4.01e-08		4.78e-13	0.2101	0.359
6	32449160	rs9394099	HLA-DRB5	intergenic	NA	NA	T	G	Imputed	0.2692	0.6351	0.08505	1.93e-05	0.2405	0.7906	0.1066	0.02756	2.03e-06		Imputed	0.429	0.6438	0.08127	6.01e-08		6.92e-13	0.2183	0.343
6	32449411	rs1964995	HLA-DRB5	intergenic	NA	NA	C	T	Genotyped	0.2696	0.6351	0.08507	1.5e-05	0.2405	0.7906	0.1066	0.02756	1.62e-06		Genotyped	0.4305	0.6391	0.08127	3.61e-08		3.4e-13	0.2077	0.364
6	32449820	rs9380309	HLA-DRB5	intergenic	NA	NA	G	A	Imputed	0.2604	0.6255	0.08654	2.77e-05	0.2364	0.8002	0.1076	0.03835	4.11e-06		Imputed	0.4148	0.6497	0.08326	2.22e-07		4.95e-12	0.1753	0.426
6	32450033	rs5020947	HLA-DRB5	intergenic	NA	NA	T	C	Imputed	0.2686	0.6263	0.08547	1.71e-05	0.2402	0.7907	0.1066	0.02764	1.83e-06		Imputed	0.4304	0.6401	0.08121	3.96e-08		4.21e-13	0.1876	0.402
6	32450089	rs5020946	HLA-DRB5	intergenic	NA	NA	T	G	Imputed	0.2689	0.6376	0.08505	2.31e-05	0.2402	0.7923	0.1066	0.029	2.52e-06		Imputed	0.4301	0.64	0.0813	4.01e-08		6.03e-13	0.2093	0.361
6	32450140	rs74944895	HLA-DRB5	intergenic	NA	NA	G	C	Imputed	0.2689	0.6376	0.08505	2.31e-05	0.2402	0.7923	0.1066	0.029	2.52e-06		Imputed	0.4304	0.6401	0.08121	3.96e-08		5.96e-13	0.2094	0.36
6	32450678	rs34452456	HLA-DRB5	intergenic	NA	NA	C	T	Imputed	0.2692	0.6351	0.08505	1.93e-05	0.2405	0.7906	0.1066	0.02756	2.03e-06		Imputed	0.4303	0.6403	0.0812	4.01e-08		4.79e-13	0.2103	0.359
6	32451570	rs13194770	HLA-DRB5	intergenic	NA	NA	T	C	Imputed	0.2692	0.6351	0.08505	1.93e-05	0.2405	0.7906	0.1066	0.02756	2.03e-06		Imputed	0.43	0.6409	0.08122	4.33e-08		5.14e-13	0.2117	0.356
6	32452361	rs71543453	HLA-DRB5	intergenic	NA	NA	T	C	Imputed	0.2692	0.6351	0.08505	1.93e-05	0.2405	0.7906	0.1066	0.02756	2.03e-06		Imputed	0.4303	0.6403	0.08121	4.04e-08		4.81e-13	0.2104	0.359
6	32452399	rs71543454	HLA-DRB5	intergenic	NA	NA	A	G	Imputed	0.2659	0.6429	0.0853	2.47e-05	0.2385	0.7877	0.1073	0.02608	2.37e-06		Imputed	0.4279	0.6438	0.08151	6.57e-08		8.88e-13	0.2549	0.268
6	32452409	rs71543455	HLA-DRB5	intergenic	NA	NA	C	G	Imputed	0.2659	0.6429	0.0853	2.47e-05	0.2385	0.7877	0.1073	0.02608	2.37e-06		Imputed	0.4279	0.6438	0.08151	6.57e-08		8.88e-13	0.2549	0.268
6	32452602	rs28453249	HLA-DRB5	intergenic	NA	NA	T	C	Imputed	0.2715	0.6462	0.08479	2.32e-05	0.2575	0.7642	0.1055	0.01084	8.66e-07		Imputed	0.4403	0.6401	0.08117	3.89e-08		1.89e-13	0.3582	0.026
6	32452626	rs28561769	HLA-DRB5	intergenic	NA	NA	G	C	Imputed	0.2659	0.6429	0.0853	2.47e-05	0.2385	0.7877	0.1073	0.02608	2.37e-06		Imputed	0.4279	0.6438	0.08151	6.57e-08		8.88e-13	0.2549	0.268
6	32453095	rs62405566	HLA-DRB5	intergenic	NA	NA	T	C	Imputed	0.2607	0.6418	0.0862	2.27e-05	0.2348	0.7748	0.1085	0.01873	1.53e-06		Imputed	0.4233	0.6416	0.08222	6.73e-08		5.71e-13	0.3134	0.138
6	32453338	rs75259234	HLA-DRB5	intergenic	NA	NA	T	C	Imputed	0.2615	0.6258	0.08633	3.01e-05	0.2374	0.7961	0.1076	0.03404	3.86e-06		Imputed	0.4244	0.641	0.08201	5.87e-08		1.37e-12	0.1753	0.426
6	32453532	rs77469652	HLA-DRB5	intergenic	NA	NA	C	T	Imputed	0.2597	0.6284	0.08659	4.46e-05	0.2366	0.7963	0.1076	0.0343	5.52e-06		Imputed	0.4223	0.6403	0.0824	6.3e-08		2.15e-12	0.1803	0.416
6	32453632	rs115610745	HLA-DRB5	intergenic	NA	NA	G	A	Imputed	0.2608	0.6284	0.08638	3.36e-05	0.2366	0.7985	0.1076	0.03656	4.61e-06		Imputed	0.4236	0.6398	0.0823	5.73e-08		1.62e-12	0.1717	0.432
6	32454327	rs9269254	HLA-DRB5	intergenic	NA	NA	C	T	Imputed	0.3773	0.6874	0.07566	7.32e-05	0.3871	0.7269	0.09527	0.000816	2.28e-07		Imputed	0.5847	0.791766	0.07812	0.00277		6.85e-09	0.4269	0
6	32543848	rs35204106	HLA-DRB1	intergenic	NA	NA	C	T	Imputed	0.1582	0.5659	0.1084	2.45e-06	0.1451	0.7625	0.1347	0.04404	5.95e-07		Imputed	0.3083	0.7199	0.08944	0.0002387		7.8e-10	0.1366	0.498
6	32546879	rs35445101	HLA-DRB1	missense	PHE,LEU	264/267	G	A	Genotyped	0.1592	0.594	0.1057	1.67e-05	0.147	0.7607	0.1338	0.04091	2.83e-06		Genotyped	0.3158	0.7356	0.08665	0.0003955		5.56e-09	0.2139	0.352
6	32548136	rs9269749	HLA-DRB1	intron	NA	NA	T	G	Imputed	0.3862	0.6717	0.0752	2.86e-05	0.3968	0.7299	0.09428	0.0008407	8.88e-08		Imputed	0.5959	0.798085	0.07915	0.004401		5.77e-09	0.2874	0.198
6	32548280	rs9269761	HLA-DRB1	intron	NA	NA	G	A	Imputed	0.363	0.688	0.07522	1.8e-05	0.3741	0.7146	0.09488	0.0003976	2.82e-08		Imputed	0.5683	0.797448	0.07864	0.00406		1.97e-09	0.3811	0
6	32549331	rs34309628	HLA-DRB1	intron	NA	NA	A	C	Imputed	0.1601	0.5961	0.1065	1.8e-05	0.1457	0.7668	0.1346	0.04848	3.7e-06		Imputed	0.3151	0.7343	0.08732	0.0004048		7.15e-09	0.2226	0.334
6	32550550	rs28724008	HLA-DRB1	intron	NA	NA	G	C	Imputed	0.1776	0.602	0.1019	2.75e-05	0.1612	0.7898	0.1283	0.06582	7.75e-06		Imputed	0.3253	0.7297	0.08624	0.0002578		8.7e-09	0.1921	0.394
6	32550905	rs28724033	HLA-DRB1	intron	NA	NA	T	C	Imputed	0.1614	0.6131	0.1053	3.55e-05	0.1492	0.777	0.1331	0.05808	8.32e-06		Imputed	0.3183	0.7272	0.08725	0.0002614		9.35e-09	0.3033	0.162
6	32555411	rs9270157	HLA-DRB1	intron	NA	NA	C	T	Imputed	0.366	0.6946	0.07504	2.03e-05	0.374	0.714	0.09465	0.0003728	3.02e-08		Imputed	0.5888	0.794913	0.07907	0.00369		1.84e-09	0.4399	0
6	32559019	rs77122291	HLA-DRB1	near-gene-5	NA	NA	A	G	Imputed	0.1599	0.6096	0.1057	1.94e-05	0.1474	0.7816	0.1333	0.06456	5.6e-06		Imputed	0.3159	0.7326	0.08681	0.000339		8.67e-09	0.2631	0.251
6	32559184	rs9270504	HLA-DRB1	near-gene-5	NA	NA	C	A	Imputed	0.3656	0.7058	0.07464	4e-05	0.376	0.7398	0.09463	0.001453	2.05e-07		Imputed	0.5961	0.812348	0.07993	0.009407		2.81e-08	0.4314	0
6	32559493	rs9270520	HLA-DRB1	near-gene-5	NA	NA	A	T	Imputed	0.3649	0.7053	0.0746	4.46e-05	0.3736	0.7351	0.09436	0.001109	1.79e-07		Imputed	0.5855	0.792393	0.07904	0.003238		6.38e-09	0.5591	0
6	32559781	rs28366267	HLA-DRB1	intergenic	NA	NA	C	A	Imputed	0.1608	0.6094	0.1057	1.71e-05	0.1477	0.7776	0.1332	0.05903	4.5e-06		Imputed	0.3159	0.7326	0.08681	0.000339		7.14e-09	0.2703	0.236
6	32559934	rs28366270	HLA-DRB1	intergenic	NA	NA	G	A	Imputed	0.1616	0.5967	0.1066	1.6e-05	0.1512	0.7744	0.1338	0.05609	3.98e-06		Imputed	0.3183	0.7379	0.08657	0.0004474		8.8e-09	0.2042	0.371
6	32560432	rs28366288	HLA-DRB1	intergenic	NA	NA	T	C	Imputed	0.1613	0.5882	0.1062	8.98e-06	0.1477	0.7776	0.1332	0.05903	2.6e-06		Imputed	0.3159	0.7326	0.08681	0.000339		4.38e-09	0.1704	0.435
6	32560606	rs9270556	HLA-DRB1	intergenic	NA	NA	G	A	Imputed	0.3662	0.6925	0.07449	1.65e-05	0.3739	0.7352	0.09435	0.001115	6.62e-08		Imputed	0.5777	0.797448	0.07756	0.003518		3.44e-09	0.4217	0
6	32560667	rs9270558	HLA-DRB1	intergenic	NA	NA	G	A	Imputed	0.365	0.6887	0.07442	1.47e-05	0.3729	0.7254	0.09417	0.0006529	3.6e-08		Imputed	0.5775	0.798085	0.07756	0.00365		2.22e-09	0.3847	0
6	32560698	rs9270559	HLA-DRB1	intergenic	NA	NA	T	G	Imputed	0.3562	0.6896	0.07463	3.13e-05	0.3524	0.738	0.09524	0.001426	1.57e-07		Imputed	0.5654	0.805802	0.07728	0.005124		1.11e-08	0.349	0.05
6	32560727	rs28366296	HLA-DRB1	intergenic	NA	NA	A	C	Imputed	0.1592	0.5896	0.1062	8.68e-06	0.1475	0.7694	0.133	0.04869	1.98e-06		Imputed	0.3158	0.7334	0.08679	0.0003539		3.6e-09	0.1867	0.404
6	32560801	rs9270567	HLA-DRB1	intergenic	NA	NA	T	G	Imputed	0.3638	0.6889	0.07442	1.71e-05	0.3729	0.7254	0.09417	0.0006529	4.19e-08		Imputed	0.5775	0.798085	0.07756	0.00365		2.5e-09	0.386	0
6	32560829	rs28366297	HLA-DRB1	intergenic	NA	NA	C	G	Imputed	0.1592	0.594	0.1059	1.34e-05	0.147	0.7607	0.1338	0.04091	2.33e-06		Imputed	0.3157	0.7337	0.08678	0.0003588		4.2e-09	0.2194	0.341
6	32560859	rs28366298	HLA-DRB1	intergenic	NA	NA	C	A	Genotyped	0.1592	0.594	0.1057	1.67e-05	0.1465	0.7664	0.1338	0.04682	3.32e-06		Imputed	0.3157	0.7337	0.08678	0.0003588		5.76e-09	0.2097	0.36
6	32560883	rs28366301	HLA-DRB1	intergenic	NA	NA	A	G	Imputed	0.1592	0.594	0.1057	1.67e-05	0.147	0.7607	0.1338	0.04091	2.83e-06		Imputed	0.3158	0.7334	0.08679	0.0003539		4.92e-09	0.2193	0.341
6	32560934	rs28366302	HLA-DRB1	intergenic	NA	NA	C	G	Genotyped	0.1592	0.594	0.1057	1.67e-05	0.1465	0.7664	0.1338	0.04679	3.32e-06		Genotyped	0.3158	0.7356	0.08665	0.0003955		6.41e-09	0.2053	0.368
6	32560963	rs28366303	HLA-DRB1	intergenic	NA	NA	G	C	Imputed	0.1592	0.594	0.1059	1.33e-05	0.1475	0.7694	0.133	0.04869	2.85e-06		Imputed	0.3158	0.7334	0.08679	0.0003539		4.96e-09	0.2057	0.368
6	32560978	rs9270570	HLA-DRB1	intergenic	NA	NA	A	G	Imputed	0.3638	0.6898	0.07441	1.81e-05	0.3729	0.7254	0.09417	0.0006529	4.44e-08		Imputed	0.5775	0.798085	0.07756	0.00365		2.61e-09	0.392	0
6	32561028	rs9270574	HLA-DRB1	intergenic	NA	NA	G	T	Imputed	0.364	0.6876	0.07438	2e-05	0.3734	0.723	0.09406	0.0005643	4.3e-08		Imputed	0.5844	0.802568	0.07848	0.00512		3.83e-09	0.3518	0.043
6	32561123	rs9270580	HLA-DRB1	intergenic	NA	NA	T	C	Imputed	0.3638	0.6879	0.07445	1.69e-05	0.3729	0.7254	0.09417	0.0006529	4.13e-08		Imputed	0.5775	0.798085	0.07754	0.00365		2.47e-09	0.3794	0
6	32561175	rs28366312	HLA-DRB1	intergenic	NA	NA	C	T	Imputed	0.1571	0.6033	0.1065	1.58e-05	0.1466	0.7636	0.1338	0.04392	2.93e-06		Imputed	0.3117	0.7319	0.0878	0.0003776		5.39e-09	0.2717	0.233
6	32561186	rs28366313	HLA-DRB1	intergenic	NA	NA	A	G	Imputed	0.1592	0.5865	0.1061	1.04e-05	0.1466	0.7636	0.1338	0.04392	2.04e-06		Imputed	0.3156	0.7346	0.08676	0.0003772		3.96e-09	0.179	0.419
6	32561201	rs28366314	HLA-DRB1	intergenic	NA	NA	G	A	Imputed	0.1592	0.5865	0.1061	1.04e-05	0.1471	0.7723	0.133	0.05216	2.52e-06		Imputed	0.3157	0.7343	0.08677	0.0003721		4.7e-09	0.1671	0.441
6	32561207	rs28366315	HLA-DRB1	intergenic	NA	NA	T	C	Imputed	0.1592	0.5865	0.1061	1.04e-05	0.1471	0.7723	0.133	0.05216	2.52e-06		Imputed	0.3157	0.7343	0.08677	0.0003721		4.7e-09	0.1671	0.441
6	32561229	rs9270583	HLA-DRB1	intergenic	NA	NA	A	G	Imputed	0.3638	0.6879	0.07445	1.69e-05	0.3729	0.7254	0.09417	0.0006529	4.13e-08		Imputed	0.5775	0.798085	0.07755	0.00367		2.48e-09	0.3794	0
6	32561246	rs28366316	HLA-DRB1	intergenic	NA	NA	C	T	Imputed	0.1592	0.5865	0.1061	1.04e-05	0.1471	0.7723	0.133	0.05216	2.52e-06		Imputed	0.3157	0.7343	0.08677	0.0003721		4.7e-09	0.1671	0.441
6	32561370	rs35139284	HLA-DRB1	intergenic	NA	NA	T	C	Imputed	0.1278	0.8179	0.1109	0.021033	0.1314	0.7754	0.1379	0.06524	0.003171		Imputed	0.2971	0.6509	0.08888	1.36e-06		4.22e-08	0.2357	0.308
6	32561390	rs9270589	HLA-DRB1	intergenic	NA	NA	C	T	Imputed	0.3638	0.6885	0.07444	1.78e-05	0.3729	0.7254	0.09417	0.0006529	4.37e-08		Imputed	0.5775	0.798085	0.07755	0.00367		2.59e-09	0.3834	0
6	32561392	rs9270590	HLA-DRB1	intergenic	NA	NA	G	A	Imputed	0.3638	0.6885	0.07444	1.78e-05	0.3729	0.7254	0.09417	0.0006529	4.37e-08		Imputed	0.5775	0.798085	0.07755	0.00367		2.59e-09	0.3834	0
6	32561411	rs28366317	HLA-DRB1	intergenic	NA	NA	T	C	Imputed	0.1592	0.5865	0.1061	1.04e-05	0.1471	0.7723	0.133	0.05216	2.52e-06		Imputed	0.3157	0.7343	0.08677	0.0003721		4.7e-09	0.1671	0.441
6	32561429	rs9270592	HLA-DRB1	intergenic	NA	NA	A	T	Imputed	0.3638	0.6885	0.07444	1.78e-05	0.3729	0.7254	0.09417	0.0006529	4.37e-08		Imputed	0.5775	0.798085	0.07755	0.00367		2.59e-09	0.3834	0
6	32561445	rs9270593	HLA-DRB1	intergenic	NA	NA	A	G	Imputed	0.3638	0.6885	0.07444	1.78e-05	0.3729	0.7254	0.09417	0.0006529	4.37e-08		Imputed	0.5775	0.798085	0.07755	0.00367		2.59e-09	0.3834	0
6	32561495	rs28366319	HLA-DRB1	intergenic	NA	NA	A	G	Imputed	0.1583	0.5822	0.1065	8.51e-06	0.1466	0.7636	0.1338	0.04392	1.72e-06		Imputed	0.3157	0.7343	0.08677	0.0003721		3.36e-09	0.163	0.449
6	32561551	rs28366320	HLA-DRB1	intergenic	NA	NA	A	G	Imputed	0.2423	0.6353	0.08901	3.08e-06	0.2334	0.7626	0.1102	0.01394	1.81e-07		Imputed	0.434	0.6274	0.08165	1.14e-08		1.16e-14	0.3187	0.125
6	32561598	rs9270597	HLA-DRB1	intergenic	NA	NA	T	G	Imputed	0.3634	0.6877	0.07443	1.81e-05	0.3724	0.7204	0.09439	0.0005108	3.56e-08		Imputed	0.5775	0.798085	0.07755	0.00367		2.22e-09	0.3733	0
6	32561609	rs28366323	HLA-DRB1	intergenic	NA	NA	G	A	Imputed	0.1583	0.5822	0.1065	8.51e-06	0.147	0.7607	0.1338	0.04091	1.58e-06		Imputed	0.3157	0.7343	0.08677	0.0003721		3.11e-09	0.1666	0.442
6	32561618	rs9270598	HLA-DRB1	intergenic	NA	NA	T	C	Imputed	0.3634	0.6877	0.07443	1.81e-05	0.3724	0.7204	0.09439	0.0005108	3.56e-08		Imputed	0.5775	0.798085	0.07755	0.00367		2.22e-09	0.3733	0
6	32561678	rs28366327	HLA-DRB1	intergenic	NA	NA	A	G	Imputed	0.1583	0.5884	0.1061	1.29e-05	0.147	0.7607	0.1338	0.04091	2.26e-06		Imputed	0.3158	0.7334	0.08679	0.0003539		4.04e-09	0.1942	0.39
6	32561766	rs28366328	HLA-DRB1	intergenic	NA	NA	G	A	Imputed	0.1583	0.5927	0.1061	1.34e-05	0.147	0.7607	0.1338	0.04091	2.33e-06		Imputed	0.3156	0.7341	0.08677	0.0003674		4.32e-09	0.2129	0.354
6	32561846	rs28366330	HLA-DRB1	intergenic	NA	NA	C	G	Imputed	0.1583	0.5927	0.1061	1.34e-05	0.147	0.7607	0.1338	0.04091	2.33e-06		Imputed	0.3148	0.7373	0.08687	0.0004516		5.41e-09	0.2055	0.368
6	32561880	rs28366331	HLA-DRB1	intergenic	NA	NA	G	T	Imputed	0.1547	0.6151	0.107	2.1e-05	0.1465	0.7664	0.1338	0.04679	4.07e-06		Imputed	0.3105	0.7336	0.08789	0.0004241		8.19e-09	0.3323	0.092
6	32561956	rs28366336	HLA-DRB1	intergenic	NA	NA	G	A	Genotyped	0.1641	0.5646	0.1051	8.45e-06	0.15	0.7944	0.1326	0.08252	3.81e-06		Genotyped	0.3158	0.7356	0.08665	0.0003955		7.23e-09	0.0704	0.623
6	32564681	rs17191234	HLA-DRB1	intergenic	NA	NA	C	A	Imputed	0.2486	0.5926	0.08799	1.97e-06	0.215	0.8049	0.1155	0.06035	7.39e-07		Imputed	0.3894	0.7849	0.08061	0.002667		1.65e-08	0.0311	0.712
6	32564784	rs28366341	HLA-DRB1	intergenic	NA	NA	C	G	Imputed	0.2552	0.5725	0.08746	4.05e-07	0.2202	0.7778	0.1141	0.02764	6.97e-08		Imputed	0.3911	0.7791	0.08065	0.001963		1.66e-09	0.0193	0.747
6	32564800	rs9270604	HLA-DRB1	intergenic	NA	NA	T	C	Imputed	0.4601	0.6176	0.07139	9.83e-08	0.4459	0.7027	0.09297	0.0001481	6.07e-11		Imputed	0.6529	0.809061	0.07893	0.0072		4.97e-11	0.0399	0.69
6	32564813	rs28366344	HLA-DRB1	intergenic	NA	NA	C	T	Imputed	0.2486	NA	0.08799	1.97e-06	0.2153	0.8081	0.1154	0.06489	8.16e-07		Imputed	0.3898	1.27632	0.08063	0.002472		1.63e-08	0.0051	0.81
6	32564869	rs9270606	HLA-DRB1	intergenic	NA	NA	C	T	Imputed	0.4601	0.6176	0.07139	9.83e-08	0.4459	0.7027	0.09297	0.0001481	6.07e-11		Imputed	0.6539	0.81103	0.07918	0.00825		6.07e-11	0.0381	0.694
6	32564990	rs28366351	HLA-DRB1	intergenic	NA	NA	A	G	Imputed	0.2552	0.5725	0.08746	4.05e-07	0.2202	0.7778	0.1141	0.02764	6.97e-08		Imputed	0.3911	0.7791	0.08065	0.001963		1.66e-09	0.0193	0.747
6	32564993	rs28366352	HLA-DRB1	intergenic	NA	NA	C	T	Imputed	0.2552	0.5725	0.08746	4.05e-07	0.2202	0.7778	0.1141	0.02764	6.97e-08		Imputed	0.3911	0.7791	0.08065	0.001963		1.66e-09	0.0193	0.747
6	32565004	rs28366353	HLA-DRB1	intergenic	NA	NA	G	A	Imputed	0.2546	0.5747	0.08755	4.2e-07	0.2202	0.7778	0.1141	0.02764	7.21e-08		Imputed	0.3911	0.7791	0.08065	0.001963		1.71e-09	0.0214	0.74
6	32565091	rs28366356	HLA-DRB1	intergenic	NA	NA	T	G	Imputed	0.2552	0.5725	0.08746	4.05e-07	0.2202	0.7778	0.1141	0.02764	6.97e-08		Imputed	0.3911	0.7791	0.08065	0.001963		1.66e-09	0.0193	0.747
6	32565115	rs9270614	HLA-DRB1	intergenic	NA	NA	C	A	Genotyped	0.4609	0.615	0.07137	8.19e-08	0.446	0.7025	0.09299	0.0001461	5.01e-11		Genotyped	0.6568	0.8285	0.07851	0.0167		1.69e-10	0.0194	0.746
6	32565138	rs28366357	HLA-DRB1	intergenic	NA	NA	T	C	Imputed	0.2552	0.5725	0.08746	4.05e-07	0.2202	0.7778	0.1141	0.02764	6.97e-08		Imputed	0.3911	0.7791	0.08065	0.001963		1.66e-09	0.0193	0.747
6	32565154	rs9270616	HLA-DRB1	intergenic	NA	NA	C	G	Imputed	0.4601	0.6176	0.07139	9.83e-08	0.4459	0.7027	0.09297	0.0001481	6.07e-11		Imputed	0.6529	0.809061	0.07893	0.0072		4.97e-11	0.0399	0.69
6	32565213	rs28366362	HLA-DRB1	intergenic	NA	NA	C	T	Imputed	0.2552	0.5725	0.08746	4.05e-07	0.2202	0.7778	0.1141	0.02764	6.97e-08		Imputed	0.3911	0.7791	0.08065	0.001963		1.66e-09	0.0193	0.747
6	32565236	rs9270618	HLA-DRB1	intergenic	NA	NA	C	T	Imputed	0.4601	0.6176	0.07139	9.83e-08	0.4459	0.7027	0.09297	0.0001481	6.07e-11		Imputed	0.6522	0.807103	0.07901	0.00674		4.45e-11	0.0424	0.684
6	32565283	rs9270621	HLA-DRB1	intergenic	NA	NA	G	A	Imputed	0.4601	0.6176	0.07139	9.83e-08	0.4459	0.7027	0.09297	0.0001481	6.07e-11		Imputed	0.6529	0.809061	0.07893	0.0072		4.97e-11	0.0399	0.69
6	32565533	rs9270632	HLA-DRB1	intergenic	NA	NA	G	A	Imputed	0.4652	0.6192	0.07202	8.31e-08	0.4502	0.7156	0.09365	0.0003521	1.22e-10		Imputed	0.6625	0.834028	0.08067	0.0243		5.63e-10	0.0224	0.737
6	32565707	rs9270642	HLA-DRB1	intergenic	NA	NA	G	T	Imputed	0.4638	0.626	0.07198	7.76e-08	0.4503	0.7068	0.09378	0.0002159	7e-11		Imputed	0.6585	0.832639	0.07963	0.0215		3.32e-10	0.0292	0.717
6	32565884	rs9270651	HLA-DRB1	intergenic	NA	NA	C	T	Imputed	0.4602	0.6172	0.07141	9.35e-08	0.446	0.7025	0.09299	0.0001461	5.7e-11		Imputed	0.6527	0.808407	0.07889	0.00698		4.54e-11	0.04	0.689
6	32565905	rs9270652	HLA-DRB1	intergenic	NA	NA	C	T	Genotyped	0.4602	0.6172	0.0714	9.64e-08	0.446	0.7025	0.09299	0.0001461	5.88e-11		Genotyped	0.6526	0.808407	0.0789	0.00704		4.7e-11	0.04	0.689
6	32565940	rs9270653	HLA-DRB1	intergenic	NA	NA	G	A	Imputed	0.4602	0.6172	0.0714	9.64e-08	0.446	0.7025	0.09299	0.0001461	5.88e-11		Imputed	0.6527	0.808407	0.07889	0.00698		4.63e-11	0.04	0.689
6	32565946	rs9270654	HLA-DRB1	intergenic	NA	NA	T	G	Imputed	0.4602	0.6172	0.0714	9.64e-08	0.446	0.7025	0.09299	0.0001461	5.88e-11		Imputed	0.6527	0.808407	0.07889	0.00698		4.63e-11	0.04	0.689
6	32565966	rs9270655	HLA-DRB1	intergenic	NA	NA	A	T	Imputed	0.4602	0.6172	0.0714	9.64e-08	0.446	0.7025	0.09299	0.0001461	5.88e-11		Imputed	0.6527	0.808407	0.07889	0.00698		4.63e-11	0.04	0.689
6	32566021	rs9270657	HLA-DRB1	intergenic	NA	NA	T	G	Imputed	0.442	0.6281	0.07183	3.93e-07	0.4314	0.7187	0.09388	0.0004338	6.75e-10		Imputed	0.6426	0.808407	0.07878	0.00694		2.73e-10	0.0596	0.645
6	32566306	rs78057728	HLA-DRB1	intergenic	NA	NA	T	C	Imputed	0.4602	0.6172	0.0714	9.64e-08	0.4459	0.7029	0.09297	0.000149	5.99e-11		Imputed	0.6524	0.809061	0.07889	0.00721		4.93e-11	0.0392	0.691
6	32566712	rs75783927	HLA-DRB1	intergenic	NA	NA	C	T	Imputed	0.2552	0.5725	0.08745	3.69e-07	0.2207	0.7766	0.1139	0.02641	6.07e-08		Imputed	0.391	0.7795	0.08063	0.002004		1.52e-09	0.0194	0.746
6	32567757	rs74587827	HLA-DRB1	intergenic	NA	NA	G	A	Imputed	0.4573	0.631	0.07134	1.63e-07	0.446	0.7025	0.09299	0.0001461	9.85e-11		Imputed	0.643	0.81367	0.07852	0.0087		9.43e-11	0.0565	0.652
6	32567897	rs28752490	HLA-DRB1	intergenic	NA	NA	A	G	Imputed	0.2524	0.5873	0.08773	5.75e-07	0.2202	0.7788	0.1141	0.02846	9.77e-08		Imputed	0.3812	0.7795	0.08132	0.002191		2.49e-09	0.0365	0.698
6	32568138	rs28752492	HLA-DRB1	intergenic	NA	NA	A	G	Imputed	0.2398	0.554	0.09252	1.32e-07	0.2086	0.7923	0.1174	0.04749	5.68e-08		Imputed	0.3714	0.7693	0.08289	0.001556		1.06e-09	0.0127	0.771
6	32568165	rs28752493	HLA-DRB1	intergenic	NA	NA	C	G	Imputed	0.2402	0.5507	0.09251	1.16e-07	0.2086	0.7923	0.1174	0.04749	5.1e-08		Imputed	0.3734	0.7694	0.08266	0.001519		9.56e-10	0.0108	0.779
6	32568481	rs28752497	HLA-DRB1	intergenic	NA	NA	A	T	Imputed	0.2524	0.5873	0.08773	5.75e-07	0.2197	0.7835	0.1142	0.03263	1.16e-07		Imputed	0.3814	0.779	0.08127	0.00212		2.75e-09	0.0351	0.701
6	32568907	rs9270769	HLA-DRB1	intergenic	NA	NA	T	A	Imputed	0.4573	0.6287	0.07148	1.61e-07	0.4467	0.7035	0.09309	0.0001582	1.05e-10		Imputed	0.6431	0.81367	0.0785	0.0085		9.81e-11	0.0523	0.661
6	32568910	rs9270770	HLA-DRB1	intergenic	NA	NA	T	A	Imputed	0.4573	0.6287	0.07148	1.61e-07	0.4467	0.7035	0.09309	0.0001582	1.05e-10		Imputed	0.6431	0.81367	0.0785	0.0085		9.81e-11	0.0523	0.661
6	32568964	rs9270771	HLA-DRB1	intergenic	NA	NA	G	T	Imputed	0.4573	0.6287	0.07148	1.61e-07	0.4467	0.7035	0.09309	0.0001582	1.05e-10		Imputed	0.6431	0.81367	0.0785	0.0085		9.81e-11	0.0523	0.661
6	32568967	rs78373427	HLA-DRB1	intergenic	NA	NA	C	T	Imputed	0.4986	1.438	0.07014	2.48e-06	0.499	1.402	0.09116	0.0002092	2.09e-09		Imputed	0.3328	1.29	0.07896	0.00125		5.85e-11	0.5759	0
6	32568990	rs9270773	HLA-DRB1	intergenic	NA	NA	A	G	Imputed	0.4573	0.6287	0.07148	1.61e-07	0.4467	0.7035	0.09309	0.0001582	1.05e-10		Imputed	0.6431	0.81367	0.0785	0.0085		9.81e-11	0.0523	0.661
6	32568995	rs28752501	HLA-DRB1	intergenic	NA	NA	A	G	Imputed	0.2524	0.5873	0.08773	5.75e-07	0.2197	0.7835	0.1142	0.03263	1.16e-07		Imputed	0.3814	0.779	0.08127	0.00212		2.75e-09	0.0351	0.701
6	32569563	rs75297049	HLA-DRB1	intergenic	NA	NA	C	T	Imputed	0.4057	0.6867	0.07244	2.66e-06	0.4095	0.7308	0.09291	0.0007384	7.36e-09		Imputed	0.579	0.803859	0.07714	0.00464		8.96e-10	0.3283	0.102
6	32569572	rs79790707	HLA-DRB1	intergenic	NA	NA	G	A	Imputed	0.4057	0.6867	0.07244	2.66e-06	0.4095	0.7308	0.09291	0.0007384	7.36e-09		Imputed	0.5782	0.801925	0.07695	0.00412		7.67e-10	0.3389	0.076
6	32569691	rs477515	HLA-DRB1	intergenic	NA	NA	A	G	Genotyped	0.2011	0.6303	0.09544	4.09e-06	0.184	0.8011	0.1222	0.06969	1.66e-06		Genotyped	0.3168	0.7392	0.08616	0.000453		4.04e-09	0.2528	0.273
6	32569792	rs476602	HLA-DRB1	intergenic	NA	NA	T	C	Imputed	0.4057	0.6867	0.07242	2.77e-06	0.4095	0.7308	0.09291	0.0007384	7.67e-09		Imputed	0.5782	0.801925	0.07695	0.00411		7.87e-10	0.3388	0.076
6	32569852	rs622137	HLA-DRB1	intergenic	NA	NA	A	G	Imputed	0.2011	0.6303	0.09544	4.09e-06	0.184	0.8011	0.1222	0.06969	1.66e-06		Imputed	0.3166	0.7398	0.08614	0.0004663		4.17e-09	0.2517	0.275
6	32570352	rs2516050	HLA-DRB1	intergenic	NA	NA	G	A	Genotyped	0.4043	0.6922	0.07258	4.02e-06	0.409	0.7269	0.09308	0.0006103	9.22e-09		Imputed	0.5889	0.790514	0.0779	0.00252		4.26e-10	0.4561	0
6	32570400	rs2516049	HLA-DRB1	intergenic	NA	NA	C	T	Genotyped	0.2011	0.6303	0.09544	4.09e-06	0.184	0.8011	0.1222	0.06969	1.66e-06		Genotyped	0.3168	0.7392	0.08616	0.000453		4.04e-09	0.2528	0.273
6	32570401	rs2454138	HLA-DRB1	intergenic	NA	NA	A	G	Genotyped	0.2011	0.6303	0.09544	4.09e-06	0.184	0.8011	0.1222	0.06969	1.66e-06		Imputed	0.3167	0.7401	0.08614	0.0004757		4.26e-09	0.2511	0.276
6	32570959	rs679243	HLA-DRB1	intergenic	NA	NA	C	T	Imputed	0.4055	0.6849	0.07266	3.46e-06	0.4091	0.7292	0.09313	0.0006958	9.03e-09		Imputed	0.5789	0.8	0.07715	0.00378		7.99e-10	0.34	0.073
6	32571166	rs680151	HLA-DRB1	intergenic	NA	NA	A	G	Imputed	0.4643	0.6162	0.07193	5.63e-08	0.4479	0.7032	0.09349	0.000166	3.95e-11		Imputed	NA	NA	NA	NA		NA	NA	NA
6	32572030	rs526784	HLA-DRB1	intergenic	NA	NA	A	T	Imputed	0.1871	0.6777	0.09891	5.79e-05	0.1755	0.7958	0.1263	0.07038	1.61e-05		Imputed	0.3098	0.7366	0.08771	0.0004915		3.33e-08	0.5949	0
6	32572048	rs28383186	HLA-DRB1	intergenic	NA	NA	T	G	Imputed	0.1871	0.6777	0.09905	4.86e-05	0.1755	0.7958	0.1263	0.07038	1.38e-05		Imputed	0.3101	0.7381	0.08757	0.0005231		3.11e-08	0.5932	0
6	32573877	rs614348	HLA-DRB1	intergenic	NA	NA	C	T	Imputed	0.2472	0.5682	0.08926	9.91e-07	0.2153	0.796	0.1161	0.04946	3.21e-07		Imputed	0.3812	0.7818	0.08115	0.002423		7.59e-09	0.014	0.766
6	32573910	rs2647071	HLA-DRB1	intergenic	NA	NA	T	C	Imputed	0.1909	0.6414	0.09694	5.44e-05	0.1673	0.8203	0.124	0.1103	2.66e-05		Imputed	0.2331	0.6759	0.09843	6.9e-05		7.21e-09	0.2793	0.216
6	32573941	rs614437	HLA-DRB1	intergenic	NA	NA	A	G	Imputed	0.4547	0.6204	0.07198	3.28e-07	0.4417	0.72	0.09375	0.0004589	6.01e-10		Imputed	0.6432	0.812348	0.07843	0.008		3.29e-10	0.0394	0.691
6	32574171	rs615672	HLA-DRB1	intergenic	NA	NA	G	C	Imputed	0.4489	0.6355	0.0725	1.23e-06	0.4381	0.7226	0.09402	0.0005501	2.6e-09		Imputed	0.6432	0.812348	0.07843	0.008		9.97e-10	0.0705	0.623
6	32574190	rs615698	HLA-DRB1	intergenic	NA	NA	A	G	Genotyped	0.4546	0.6281	0.07165	2.06e-07	0.446	0.6959	0.09328	0.0001014	8.78e-11		NA	NA	NA	NA	NA		NA	NA	NA
6	32574305	rs616187	HLA-DRB1	intergenic	NA	NA	G	A	Genotyped	0.4344	0.6286	0.07193	7.04e-07	0.428	0.7204	0.09413	0.0004955	1.36e-09		Genotyped	0.6322	0.815661	0.07832	0.00914		6.87e-10	0.0491	0.668
6	32574736	rs618095	HLA-DRB1	intergenic	NA	NA	G	A	Genotyped	0.4553	0.6237	0.07168	2.1e-07	0.446	0.6959	0.09328	0.0001014	8.92e-11		Genotyped	0.6431	0.812348	0.07845	0.00813		7.94e-11	0.0452	0.677
6	32575391	rs2858866	HLA-DRB1	intergenic	NA	NA	C	G	Genotyped	0.456	0.6255	0.0718	1.25e-07	0.4465	0.6988	0.09331	0.0001228	6.39e-11		Genotyped	0.3569	1.231	0.07845	0.008131		0.00425	2.88883e-10	0.954
6	32575493	rs486912	HLA-DRB1	intergenic	NA	NA	G	C	Genotyped	0.456	0.6255	0.0718	1.25e-07	0.4465	0.6988	0.09331	0.0001228	6.39e-11		Genotyped	0.3569	1.231	0.07845	0.008131		0.00425	2.88883e-10	0.954
6	32575725	rs116119619	HLA-DRB1	intergenic	NA	NA	A	G	Imputed	0.04864	1.532	0.1471	5.67e-05	0.05943	2.177	0.1975	8.14e-05	2.44e-08		Imputed	0.0106	1.911	0.3101	0.0368		4.79e-08	0.3466	0.056
6	32575735	rs9461776	HLA-DRB1	intergenic	NA	NA	G	A	Genotyped	0.1166	1.774	0.09852	1.51e-06	0.1145	1.604	0.1416	0.0008463	4.83e-09		Genotyped	0.08914	1.467	0.1195	0.00134		1.21e-10	0.466	0
6	32575746	rs3021303	HLA-DRB1	intergenic	NA	NA	G	T	Genotyped	0.456	0.6308	0.07171	1.58e-07	0.447	0.6976	0.09323	0.0001118	7.39e-11		Genotyped	0.6433	0.816993	0.07845	0.00994		9.53e-11	0.0511	0.664
6	32575918	rs643889	HLA-DRB1	intergenic	NA	NA	T	A	Genotyped	0.2514	0.5758	0.08871	3.61e-07	0.221	0.7712	0.1145	0.02326	5.08e-08		Genotyped	0.3815	0.7802	0.08121	0.002236		1.52e-09	0.0254	0.728
6	32576009	rs482205	HLA-DRB1	intergenic	NA	NA	G	T	Genotyped	0.2514	0.5758	0.08871	3.61e-07	0.2205	0.7761	0.1145	0.02681	6.08e-08		Genotyped	0.3815	0.7802	0.08121	0.002236		1.76e-09	0.0242	0.731
6	32576019	rs482162	HLA-DRB1	intergenic	NA	NA	C	T	Genotyped	0.2514	0.5758	0.08871	3.61e-07	0.2205	0.7761	0.1145	0.02681	6.08e-08		Genotyped	0.3815	0.7802	0.08121	0.002236		1.76e-09	0.0242	0.731
6	32576114	rs481245	HLA-DRB1	intergenic	NA	NA	A	C	Imputed	0.456	0.6288	0.07186	1.36e-07	0.4464	0.6992	0.09331	0.0001253	7.12e-11		Genotyped	0.6434	0.809717	0.07837	0.00717		5.58e-11	0.0589	0.647
6	32576145	rs481139	HLA-DRB1	intergenic	NA	NA	A	C	Imputed	0.2514	0.5758	0.08871	3.61e-07	0.2207	0.774	0.1145	0.02524	5.62e-08		Imputed	0.3814	0.7806	0.08119	0.002281		1.69e-09	0.0245	0.73
6	32576446	rs646159	HLA-DRB1	intergenic	NA	NA	C	T	Imputed	0.456	0.6288	0.07186	1.36e-07	0.4464	0.6992	0.09331	0.0001253	7.12e-11		Imputed	0.6433	0.813008	0.0785	0.00833		7.01e-11	0.054	0.657
6	32576538	rs566861	HLA-DRB1	intergenic	NA	NA	G	A	Genotyped	0.5084	1.445	0.07014	5.82e-06	0.4985	1.409	0.09132	0.0001758	4.29e-09		Genotyped	0.3336	1.287	0.07884	0.00137		1.14e-10	0.5313	0
6	32576592	rs646984	HLA-DRB1	intergenic	NA	NA	C	A	Imputed	0.2796	0.708	0.08478	2.22e-05	0.2609	0.8368	0.1078	0.09849	1.08e-05		Imputed	0.3912	0.7635	0.08085	0.0008472		4.18e-08	0.4729	0
6	32576626	rs647035	HLA-DRB1	intergenic	NA	NA	A	G	Genotyped	0.2954	0.688	0.08088	1.93e-05	0.276	0.8114	0.104	0.04452	3.54e-06		Imputed	0.4037	0.7619	0.07929	0.0006064		1.08e-08	0.4229	0
6	32576726	rs647467	HLA-DRB1	intergenic	NA	NA	T	C	Imputed	0.4829	1.524	0.07179	7.95e-07	0.4879	1.469	0.09351	3.94e-05	1.45e-10		Imputed	NA	NA	NA	NA		NA	NA	NA
6	32577497	rs536810	HLA-DRB1	intergenic	NA	NA	T	C	Genotyped	0.2954	0.688	0.08088	1.93e-05	0.276	0.8086	0.104	0.041	3.21e-06		Genotyped	0.405	0.7581	0.07923	0.0004723		7.55e-09	0.4428	0
6	32577604	rs535852	HLA-DRB1	intergenic	NA	NA	T	C	Imputed	0.2905	0.7143	0.0811	3.02e-05	0.2728	0.7874	0.1049	0.02276	2.44e-06		Imputed	0.4048	0.7584	0.07924	0.0004839		6.1e-09	0.7435	0
6	32577814	rs673002	HLA-DRB1	intergenic	NA	NA	T	G	Genotyped	0.5084	1.445	0.07014	5.82e-06	0.4985	1.409	0.09132	0.0001758	4.29e-09		Genotyped	0.3333	1.29	0.07887	0.00127		1.03e-10	0.5457	0
6	32578229	rs2858864	HLA-DRB1	intergenic	NA	NA	T	C	Imputed	0.4244	1.169	0.06922	2.98e-05	0.4284	1.397	0.09221	0.0002858	3.57e-08		Imputed	0.2784	1.318	0.08168	0.000731		2.73e-10	0.2583	0.261
6	32578352	rs113012981	HLA-DRB1	intergenic	NA	NA	G	A	Imputed	0.1147	1.793	0.099	6.97e-07	0.1177	1.537	0.1413	0.002368	6.57e-09		Imputed	0.08799	1.44	0.1212	0.0026		3.85e-10	0.3442	0.062
6	32578369	rs9271190	HLA-DRB1	intergenic	NA	NA	A	C	Imputed	0.4253	1.174	0.06918	2.88e-05	0.4295	1.396	0.09198	0.0002868	3.46e-08		Imputed	0.2827	1.289	0.08139	0.00181		8.52e-10	0.3068	0.154
6	32578653	rs77064057	HLA-DRB1	intergenic	NA	NA	G	A	Imputed	0.4253	1.174	0.06919	2.94e-05	0.4295	1.396	0.09198	0.0002868	3.53e-08		Imputed	0.2827	1.293	0.0813	0.00158		7.27e-10	0.3037	0.161
6	32578656	rs75639337	HLA-DRB1	intergenic	NA	NA	T	C	Imputed	0.4253	1.174	0.06919	2.94e-05	0.4295	1.396	0.09198	0.0002868	3.53e-08		Imputed	0.2827	1.293	0.0813	0.00158		7.27e-10	0.3037	0.161
6	32578917	rs76946723	HLA-DRB1	intergenic	NA	NA	T	A	Genotyped	0.4253	1.169	0.06921	3.38e-05	0.4295	1.396	0.09198	0.0002868	4.09e-08		Genotyped	0.2814	1.282	0.08197	0.00246		1.45e-09	0.2926	0.186
6	32578970	rs502771	HLA-DRB1	intergenic	NA	NA	C	T	Genotyped	0.4253	1.174	0.06918	2.88e-05	0.4295	1.396	0.09198	0.0002868	3.46e-08		Genotyped	0.2828	1.292	0.08132	0.00164		7.54e-10	0.3044	0.159
6	32579003	rs502055	HLA-DRB1	intergenic	NA	NA	C	T	Genotyped	0.4232	1.174	0.06882	3.88e-05	0.4285	1.405	0.09187	0.0002157	3.71e-08		Genotyped	0.2832	1.297	0.0813	0.00136		6.26e-10	0.2758	0.224
6	32579567	rs583177	HLA-DRB1	intergenic	NA	NA	A	C	Imputed	0.4244	1.179	0.06923	2.51e-05	0.4289	1.403	0.09213	0.0002345	2.52e-08		Imputed	0.2827	1.298	0.08133	0.00135		4.56e-10	0.3022	0.164
6	32579702	rs79021089	HLA-DRB1	intergenic	NA	NA	T	C	Imputed	0.4232	1.18	0.06922	2.13e-05	0.429	1.403	0.09213	0.0002401	2.17e-08		Imputed	0.2828	1.297	0.08134	0.00137		4.12e-10	0.3069	0.154
6	32580007	rs77828616	HLA-DRB1	intergenic	NA	NA	A	G	Imputed	0.4232	1.18	0.0692	2.13e-05	0.429	1.403	0.09213	0.0002401	2.17e-08		Imputed	0.2828	1.288	0.08132	0.00186		6.08e-10	0.3131	0.139
6	32580028	rs3104420	HLA-DRB1	intergenic	NA	NA	A	G	Imputed	0.4232	1.18	0.0692	2.13e-05	0.429	1.403	0.09213	0.0002401	2.17e-08		Imputed	0.2829	1.287	0.08133	0.0019		6.27e-10	0.3138	0.137
6	32580321	rs79866702	HLA-DRB1	intergenic	NA	NA	T	C	Genotyped	0.4232	1.18	0.0692	2.13e-05	0.429	1.403	0.09213	0.0002401	2.17e-08		Genotyped	0.2828	1.292	0.08132	0.00164		5.2e-10	0.3105	0.145
6	32580322	rs77627072	HLA-DRB1	intergenic	NA	NA	G	A	Imputed	0.4223	1.18	0.06922	1.8e-05	0.429	1.403	0.09213	0.0002401	1.82e-08		Imputed	0.2827	1.293	0.0813	0.00159		4.33e-10	0.3099	0.146
6	32580571	rs80243928	HLA-DRB1	intergenic	NA	NA	T	C	Imputed	0.4224	1.188	0.06925	1.78e-05	0.4289	1.402	0.09216	0.0002462	1.84e-08		Imputed	0.2825	1.29	0.08138	0.00175		4.94e-10	0.347	0.055
6	32580632	rs79838044	HLA-DRB1	intergenic	NA	NA	C	T	Imputed	0.4224	1.179	0.0693	2.11e-05	0.4289	1.402	0.09216	0.0002462	2.19e-08		Imputed	0.2825	1.29	0.08138	0.00175		5.68e-10	0.3112	0.143
6	32580790	rs77568742	HLA-DRB1	intergenic	NA	NA	C	T	Imputed	0.4215	1.177	0.06938	2.24e-05	0.4278	1.413	0.09244	0.0001858	1.83e-08		Imputed	0.2825	1.29	0.08138	0.00175		4.94e-10	0.2768	0.221
6	32580869	rs76662008	HLA-DRB1	intergenic	NA	NA	G	C	Imputed	0.4215	1.177	0.06938	2.24e-05	0.4278	1.413	0.09244	0.0001858	1.83e-08		Imputed	0.2825	1.29	0.08138	0.00175		4.94e-10	0.2768	0.221
6	32581047	rs9271280	HLA-DRB1	intergenic	NA	NA	A	T	Imputed	0.4215	1.176	0.06933	2.66e-05	0.4278	1.413	0.09244	0.0001858	2.19e-08		Imputed	0.2823	1.292	0.08134	0.00164		5.23e-10	0.2718	0.232
6	32581614	rs9271301	HLA-DQA1	intergenic	NA	NA	T	C	Imputed	0.4224	1.179	0.06931	2.14e-05	0.429	1.403	0.09213	0.0002401	2.18e-08		Imputed	0.2828	1.289	0.0814	0.00184		6.04e-10	0.3091	0.148
6	32581922	rs522308	HLA-DQA1	intergenic	NA	NA	T	C	Imputed	0.1814	0.6404	0.1022	1.25e-05	0.1578	0.8255	0.1287	0.1363	1.05e-05		Imputed	0.3161	0.7411	0.08643	0.0005274		2.45e-08	0.2792	0.216
6	32582527	rs9271326	HLA-DQA1	intergenic	NA	NA	T	C	Imputed	0.4312	1.161	0.06952	9.31e-05	0.4312	1.42	0.09259	0.0001515	7.04e-08		Imputed	0.2828	1.292	0.0813	0.001621		1.35e-09	0.2074	0.364
6	32582640	rs9271330	HLA-DQA1	intergenic	NA	NA	A	G	Imputed	0.4312	1.161	0.06952	9.31e-05	0.4312	1.42	0.09259	0.0001515	7.04e-08		Imputed	0.2826	1.29	0.08137	0.001769		1.5e-09	0.2085	0.362
6	32582678	rs9271333	HLA-DQA1	intergenic	NA	NA	T	C	Imputed	0.4306	1.163	0.06952	8.63e-05	0.4312	1.42	0.09259	0.0001515	6.48e-08		Imputed	0.2826	1.29	0.08137	0.001769		1.4e-09	0.2147	0.35
6	32582711	rs9271334	HLA-DQA1	intergenic	NA	NA	C	A	Imputed	0.4223	1.178	0.06929	2.13e-05	0.4289	1.404	0.09215	0.0002316	2.09e-08		Imputed	0.2824	1.291	0.08136	0.0017		5.28e-10	0.3013	0.166
6	32582843	rs7756647	HLA-DQA1	intergenic	NA	NA	G	A	Imputed	0.4319	1.138	0.06986	4.8e-05	0.4361	1.417	0.09268	0.0001683	3.79e-08		Imputed	NA	NA	NA	NA		NA	NA	NA
6	32583212	rs28383221	HLA-DQA1	intergenic	NA	NA	G	A	Imputed	0.4572	0.8959	0.07009	8.74e-05	0.4339	0.792	0.09253	0.01171	3.24e-06		Imputed	0.5741	0.644745	0.07765	1.62e-08		3.54e-13	0.0069	0.799
6	32583576	rs28752514	HLA-DQA1	intergenic	NA	NA	C	T	Imputed	0.458	0.8879	0.07004	7.54e-05	0.4339	0.792	0.09253	0.01171	2.82e-06		Imputed	0.5741	0.645161	0.07766	1.65e-08		3.07e-13	0.0091	0.787
6	32583653	rs28383224	HLA-DQA1	intergenic	NA	NA	G	A	Imputed	0.458	0.8879	0.07004	7.54e-05	0.4339	0.792	0.09253	0.01171	2.82e-06		Imputed	0.5741	0.645161	0.07768	1.66e-08		3.09e-13	0.0091	0.787
6	32584088	rs28383230	HLA-DQA1	intergenic	NA	NA	C	T	Imputed	0.4498	0.9083	0.07056	0.000297986	0.4279	0.8031	0.09285	0.01822	1.61e-05		Imputed	0.5675	0.655738	0.07836	7.3e-08		7.86e-12	0.0083	0.792
6	32584099	rs28383231	HLA-DQA1	intergenic	NA	NA	T	C	Imputed	0.4498	0.9083	0.07056	0.000297986	0.4279	0.8031	0.09285	0.01822	1.61e-05		Imputed	0.5675	0.655738	0.07836	7.3e-08		7.86e-12	0.0083	0.792
6	32584153	rs28383233	HLA-DQA1	intergenic	NA	NA	A	G	Imputed	0.4498	0.9083	0.07056	0.000297986	0.4279	0.8031	0.09285	0.01822	1.61e-05		Imputed	0.5675	0.655738	0.07836	7.3e-08		7.86e-12	0.0083	0.792
6	32584769	rs74889237	HLA-DQA1	intergenic	NA	NA	G	A	Imputed	0.4496	0.9192	0.07101	0.000383005	0.4271	0.7726	0.09393	0.006032	7.2e-06		Imputed	0.5669	0.638162	0.07864	1.12e-08		6.18e-13	0.0026	0.831
6	32585288	rs146146117	HLA-DQA1	intergenic	NA	NA	T	C	Imputed	0.02991	2.113	0.174	9.63e-10	0.04299	1.983	0.2316	0.003123	2.37e-11		Imputed	NA	NA	NA	NA		NA	NA	NA
6	32586961	rs114812135	HLA-DQA1	intergenic	NA	NA	T	A	Imputed	0.07223	1.594	0.1167	6.48e-06	0.0825	1.654	0.1617	0.001857	4.31e-08		Imputed	0.03944	1.374	0.178	0.07424		2.23e-07	0.7141	0
6	32587090	rs28383312	HLA-DQA1	intergenic	NA	NA	T	C	Imputed	0.239	0.5529	0.09164	2.3e-07	0.2058	0.7896	0.1188	0.04677	8.74e-08		Imputed	0.3764	0.7574	0.08251	0.0007562		5.94e-10	0.0152	0.761
6	32587117	rs28383313	HLA-DQA1	intergenic	NA	NA	G	C	Imputed	0.2063	0.6053	0.09606	1.18e-06	0.1855	0.7972	0.1225	0.06426	5.26e-07		Imputed	0.3266	0.739	0.0853	0.0003916		1.27e-09	0.1481	0.476
6	32587588	rs9271406	HLA-DQA1	intergenic	NA	NA	G	A	Imputed	0.3148	0.7461	0.07849	6.48e-05	0.3141	0.8262	0.09892	0.05367	1.28e-05		Imputed	0.4623	0.6106	0.08086	1.06e-09		1.64e-13	0.0445	0.679
6	32587613	rs9271408	HLA-DQA1	intergenic	NA	NA	T	C	Imputed	0.1888	0.5998	0.1003	1.6e-06	0.1707	0.8471	0.1264	0.1893	3.32e-06		Imputed	0.316	0.7337	0.08663	0.0003507		5.62e-09	0.0856	0.593
6	32587628	rs9271409	HLA-DQA1	intergenic	NA	NA	C	G	Imputed	0.1888	0.6088	0.0994	4.49e-06	0.171	0.8434	0.1263	0.1775	6.75e-06		Imputed	0.316	0.7337	0.08663	0.0003507		1.06e-08	0.1111	0.545
6	32587661	rs9271411	HLA-DQA1	intergenic	NA	NA	A	G	Imputed	0.1888	0.6088	0.0994	4.49e-06	0.171	0.8434	0.1263	0.1775	6.75e-06		Imputed	0.316	0.7337	0.08663	0.0003507		1.06e-08	0.1111	0.545
6	32587812	rs9271416	HLA-DQA1	intergenic	NA	NA	A	G	Imputed	0.1888	0.6088	0.0994	4.49e-06	0.171	0.8434	0.1263	0.1775	6.75e-06		Imputed	0.316	0.7337	0.08663	0.0003507		1.06e-08	0.1111	0.545
6	32587973	rs9271426	HLA-DQA1	intergenic	NA	NA	A	G	Imputed	0.1888	0.6088	0.0994	4.49e-06	0.171	0.8434	0.1263	0.1775	6.75e-06		Imputed	0.316	0.7337	0.08663	0.0003507		1.06e-08	0.1111	0.545
6	32588002	rs9271430	HLA-DQA1	intergenic	NA	NA	C	T	Imputed	0.1888	0.6088	0.0994	4.49e-06	0.171	0.8434	0.1263	0.1775	6.75e-06		Imputed	0.316	0.7337	0.08663	0.0003507		1.06e-08	0.1111	0.545
6	32588193	rs9271438	HLA-DQA1	intergenic	NA	NA	G	A	Imputed	0.1888	0.6088	0.0994	4.49e-06	0.171	0.8434	0.1263	0.1775	6.75e-06		Imputed	0.3145	0.7286	0.08711	0.0002776		8.23e-09	0.1145	0.538
6	32588260	rs9271442	HLA-DQA1	intergenic	NA	NA	A	T	Imputed	0.239	0.559	0.09105	5.8e-07	0.2067	0.7976	0.1181	0.05551	2.4e-07		Imputed	0.3796	0.7728	0.08167	0.0016		3.46e-09	0.0125	0.772
6	32588435	rs9271456	HLA-DQA1	intergenic	NA	NA	T	C	Imputed	0.2242	0.5777	0.0952	5.38e-06	0.1916	0.798	0.1226	0.06582	1.93e-06		Imputed	0.3685	0.7781	0.08272	0.002416		3.21e-08	0.0331	0.707
6	32588500	rs9271461	HLA-DQA1	intergenic	NA	NA	A	G	Imputed	0.2303	0.5717	0.09342	2.65e-06	0.1974	0.7882	0.1207	0.04858	7.15e-07		Imputed	0.3722	0.783	0.08209	0.002887		1.76e-08	0.0233	0.734
6	32588544	rs9271464	HLA-DQA1	intergenic	NA	NA	T	A	Imputed	0.1861	0.6048	0.09968	4.85e-06	0.1705	0.8436	0.1263	0.1781	7.24e-06		Imputed	0.314	0.7318	0.08722	0.0003435		1.1e-08	0.102	0.562
6	32588554	rs9271465	HLA-DQA1	intergenic	NA	NA	T	C	Imputed	0.1878	0.5996	0.09993	5.85e-06	0.1717	0.8397	0.1266	0.1678	7.68e-06		Imputed	0.3154	0.7264	0.08748	0.0002588		8.64e-09	0.0981	0.569
6	32588630	rs9271469	HLA-DQA1	intergenic	NA	NA	C	T	Imputed	0.1868	0.6038	0.09969	3.95e-06	0.1705	0.8436	0.1263	0.1781	6.16e-06		Imputed	0.3159	0.734	0.08662	0.0003579		9.97e-09	0.0979	0.57
6	32588662	rs9271470	HLA-DQA1	intergenic	NA	NA	T	C	Imputed	0.1868	0.6038	0.09969	3.95e-06	0.1705	0.8436	0.1263	0.1781	6.16e-06		Imputed	0.316	0.7337	0.08663	0.0003507		9.76e-09	0.0981	0.569
6	32588700	rs9271472	HLA-DQA1	intergenic	NA	NA	T	C	Imputed	0.1868	0.6038	0.09969	3.95e-06	0.1705	0.8436	0.1263	0.1781	6.16e-06		Imputed	0.316	0.7337	0.08663	0.0003507		9.76e-09	0.0981	0.569
6	32588707	rs9271474	HLA-DQA1	intergenic	NA	NA	A	G	Imputed	0.1868	0.6038	0.09969	3.95e-06	0.1705	0.8436	0.1263	0.1781	6.16e-06		Imputed	0.316	0.7337	0.08663	0.0003507		9.76e-09	0.0981	0.569
6	32588953	rs78474935	HLA-DQA1	intergenic	NA	NA	G	A	Imputed	0.1872	0.6038	0.09969	3.53e-06	0.1705	0.8436	0.1263	0.1781	5.63e-06		Imputed	0.3161	0.7356	0.08651	0.0003855		9.97e-09	0.0968	0.572
6	32589122	rs9271492	HLA-DQA1	intergenic	NA	NA	A	C	Imputed	0.4533	0.7371	0.07072	1.69e-05	0.4655	0.7353	0.09107	0.0007345	4.6e-08		Imputed	0.6118	0.762777	0.07757	0.000479		2.06e-10	0.9344	0
6	32589282	rs9271498	HLA-DQA1	intergenic	NA	NA	A	G	Genotyped	0.1892	0.6088	0.0994	4.01e-06	0.171	0.8434	0.1263	0.1775	6.17e-06		Genotyped	0.3162	0.7352	0.08652	0.0003779		1.06e-08	0.11	0.547
6	32589326	rs9271503	HLA-DQA1	intergenic	NA	NA	A	C	Imputed	0.1892	0.6088	0.0994	4.01e-06	0.171	0.8434	0.1263	0.1775	6.17e-06		Imputed	0.3161	0.7356	0.08651	0.0003855		1.08e-08	0.1097	0.547
6	32589483	rs9271511	HLA-DQA1	intergenic	NA	NA	A	G	Imputed	0.1892	0.6088	0.0994	4.01e-06	0.171	0.8434	0.1263	0.1775	6.17e-06		Imputed	0.3161	0.7334	0.08664	0.0003445		9.58e-09	0.1113	0.545
6	32589668	rs9271516	HLA-DQA1	intergenic	NA	NA	A	C	Imputed	0.1892	0.6088	0.0994	4.01e-06	0.171	0.8434	0.1263	0.1775	6.17e-06		Imputed	0.3161	0.7334	0.08664	0.0003445		9.58e-09	0.1113	0.545
6	32589771	rs9271520	HLA-DQA1	intergenic	NA	NA	G	A	Imputed	0.1892	0.6088	0.0994	4.01e-06	0.171	0.8434	0.1263	0.1775	6.17e-06		Imputed	0.3161	0.7356	0.08651	0.0003855		1.08e-08	0.1097	0.547
6	32589806	rs9271523	HLA-DQA1	intergenic	NA	NA	G	A	Imputed	0.1892	0.6088	0.0994	4.01e-06	0.171	0.8434	0.1263	0.1775	6.17e-06		Imputed	0.3161	0.7356	0.08651	0.0003855		1.08e-08	0.1097	0.547
6	32590120	rs9271544	HLA-DQA1	intergenic	NA	NA	A	C	Imputed	0.1892	0.6088	0.0994	4.01e-06	0.171	0.8434	0.1263	0.1775	6.17e-06		Imputed	0.3161	0.7356	0.08651	0.0003855		1.08e-08	0.1097	0.547
6	32590248	rs9271549	HLA-DQA1	intergenic	NA	NA	C	T	Imputed	0.1892	0.6088	0.0994	4.01e-06	0.171	0.8434	0.1263	0.1775	6.17e-06		Imputed	0.3161	0.7356	0.08651	0.0003855		1.08e-08	0.1097	0.547
6	32590381	rs9271560	HLA-DQA1	intergenic	NA	NA	T	A	Imputed	0.1892	0.6088	0.0994	4.01e-06	0.171	0.8434	0.1263	0.1775	6.17e-06		Imputed	0.3161	0.7356	0.08651	0.0003855		1.08e-08	0.1097	0.547
6	32590393	rs9271561	HLA-DQA1	intergenic	NA	NA	G	T	Imputed	0.1892	0.6088	0.0994	4.01e-06	0.171	0.8434	0.1263	0.1775	6.17e-06		Imputed	0.3161	0.7356	0.08651	0.0003855		1.08e-08	0.1097	0.547
6	32590590	rs9271574	HLA-DQA1	intergenic	NA	NA	G	T	Imputed	0.1892	0.6088	0.0994	4.01e-06	0.171	0.8434	0.1263	0.1775	6.17e-06		Imputed	0.3161	0.7359	0.0865	0.0003927		1.1e-08	0.1095	0.548
6	32590612	rs9271576	HLA-DQA1	intergenic	NA	NA	C	T	Imputed	0.1892	0.6088	0.09956	4.38e-06	0.1703	0.8439	0.1265	0.1798	6.74e-06		Imputed	0.3158	0.7367	0.08654	0.0004146		1.27e-08	0.109	0.549
6	32590870	rs9271584	HLA-DQA1	intergenic	NA	NA	C	T	Imputed	0.1892	0.6088	0.0994	4.01e-06	0.171	0.8434	0.1263	0.1775	6.17e-06		Imputed	0.3161	0.7359	0.0865	0.0003927		1.1e-08	0.1095	0.548
6	32590879	rs9271585	HLA-DQA1	intergenic	NA	NA	A	C	Imputed	0.1892	0.6088	0.0994	4.01e-06	0.171	0.8434	0.1263	0.1775	6.17e-06		Imputed	0.3161	0.7356	0.08651	0.0003855		1.08e-08	0.1097	0.547
6	32591128	rs9271589	HLA-DQA1	intergenic	NA	NA	A	G	Genotyped	0.1892	0.6088	0.09941	3.27e-06	0.173	0.8362	0.1256	0.1545	4.25e-06		Genotyped	0.3177	0.7294	0.08642	0.0002618		5.1e-09	0.1238	0.521
6	32591173	rs9271592	HLA-DQA1	intergenic	NA	NA	T	C	Imputed	0.1892	0.6088	0.0994	4.01e-06	0.171	0.8434	0.1263	0.1775	6.17e-06		Imputed	0.3161	0.7356	0.08651	0.0003855		1.08e-08	0.1097	0.547
6	32591235	rs9271595	HLA-DQA1	intergenic	NA	NA	G	A	Imputed	0.1892	0.6088	0.09943	4.59e-06	0.171	0.8434	0.1263	0.1775	6.87e-06		Imputed	0.3161	0.7359	0.0865	0.0003913		1.21e-08	0.1096	0.548
6	32591237	rs9271596	HLA-DQA1	intergenic	NA	NA	G	A	Imputed	0.1892	0.6088	0.09943	4.59e-06	0.171	0.8434	0.1263	0.1775	6.87e-06		Imputed	0.3161	0.7359	0.0865	0.000392		1.21e-08	0.1096	0.548
6	32591448	rs9271605	HLA-DQA1	intergenic	NA	NA	A	G	Imputed	0.1892	0.6088	0.0994	4.01e-06	0.171	0.8434	0.1263	0.1775	6.17e-06		Imputed	0.316	0.7367	0.08648	0.0004101		1.16e-08	0.1089	0.549
6	32591566	rs9271607	HLA-DQA1	intergenic	NA	NA	G	A	Imputed	0.1892	0.6088	0.0994	4.01e-06	0.171	0.8434	0.1263	0.1775	6.17e-06		Imputed	0.316	0.7367	0.08648	0.0004101		1.16e-08	0.1089	0.549
6	32591597	rs9271609	HLA-DQA1	intergenic	NA	NA	C	T	Imputed	0.1892	0.6088	0.0994	4.01e-06	0.171	0.8434	0.1263	0.1775	6.17e-06		Imputed	0.316	0.7367	0.08648	0.0004101		1.16e-08	0.1089	0.549
6	32591921	rs9271624	HLA-DQA1	intergenic	NA	NA	T	G	Imputed	0.1888	0.6127	0.09957	5.03e-06	0.1703	0.8439	0.1265	0.1798	7.53e-06		Imputed	0.3156	0.734	0.08677	0.000366		1.22e-08	0.1223	0.524
6	32591971	rs9271628	HLA-DQA1	intergenic	NA	NA	G	T	Imputed	0.1892	0.6088	0.0994	4.01e-06	0.171	0.8434	0.1263	0.1775	6.17e-06		Imputed	0.3158	0.7332	0.08674	0.0003465		9.62e-09	0.1115	0.544
6	32592124	rs9271637	HLA-DQA1	intergenic	NA	NA	G	A	Imputed	0.1888	0.6127	0.09957	5.03e-06	0.1707	0.8398	0.1264	0.1672	6.76e-06		Imputed	0.3158	0.7332	0.08674	0.0003465		1.05e-08	0.1292	0.511
6	32592209	rs9271641	HLA-DQA1	intergenic	NA	NA	A	G	Imputed	0.3266	1.346	0.0716	2.23e-06	0.375	1.167	0.09455	0.1022	1.7e-06		Imputed	0.1819	1.328	0.09576	0.003045		3.75e-08	0.4568	0
6	32592229	rs9271643	HLA-DQA1	intergenic	NA	NA	A	G	Imputed	0.1892	0.6088	0.0994	4.01e-06	0.171	0.8434	0.1263	0.1775	6.17e-06		Imputed	0.3159	0.7324	0.08675	0.0003308		9.16e-09	0.112	0.543
6	32592337	rs9271644	HLA-DQA1	intergenic	NA	NA	A	G	Imputed	0.1892	0.6088	0.0994	4.01e-06	0.171	0.8434	0.1263	0.1775	6.17e-06		Imputed	0.3159	0.7324	0.08675	0.0003308		9.16e-09	0.112	0.543
6	32592360	rs4246055	HLA-DQA1	intergenic	NA	NA	T	C	Imputed	0.1928	1.31	0.08324	2.8e-06	0.2134	1.458	0.111	0.0006717	7.06e-09		Imputed	0.06278	1.067	0.1531	0.6727		8.4e-06	0.2559	0.266
6	32592602	rs9271660	HLA-DQA1	intergenic	NA	NA	G	T	Imputed	0.1899	0.6414	0.09973	1.45e-05	0.1731	0.8437	0.1269	0.1802	1.81e-05		Imputed	0.317	0.7248	0.08696	0.0002147		1.57e-08	0.2337	0.312
6	32592605	rs9271661	HLA-DQA1	intergenic	NA	NA	A	T	Imputed	0.1899	0.6414	0.09973	1.45e-05	0.1731	0.8437	0.1269	0.1802	1.81e-05		Imputed	0.317	0.7248	0.08696	0.0002147		1.57e-08	0.2337	0.312
6	32592845	rs9271674	HLA-DQA1	intergenic	NA	NA	C	T	Imputed	0.1881	0.6088	0.09946	4.68e-06	0.171	0.8434	0.1263	0.1775	6.98e-06		Imputed	0.3149	0.735	0.08681	0.0003891		1.22e-08	0.1104	0.546
6	32592862	rs9271675	HLA-DQA1	intergenic	NA	NA	C	T	Imputed	0.1877	0.618	0.09955	8.07e-06	0.1707	0.8467	0.1264	0.1878	1.18e-05		Imputed	0.3148	0.7356	0.08679	0.0004036		2.03e-08	0.1326	0.505
6	32592868	rs9271676	HLA-DQA1	intergenic	NA	NA	C	T	Imputed	0.1877	0.618	0.09955	8.07e-06	0.1707	0.8467	0.1264	0.1878	1.18e-05		Imputed	0.3149	0.7353	0.08679	0.0003955		1.98e-08	0.1328	0.505
6	32592970	rs9271685	HLA-DQA1	intergenic	NA	NA	C	T	Imputed	0.1881	0.6088	0.09946	4.68e-06	0.171	0.8434	0.1263	0.1775	6.98e-06		Imputed	0.3149	0.735	0.08681	0.0003891		1.22e-08	0.1104	0.546
6	32593033	rs9271693	HLA-DQA1	intergenic	NA	NA	T	C	Imputed	0.1881	0.6088	0.09946	4.68e-06	0.171	0.8434	0.1263	0.1775	6.98e-06		Imputed	0.3149	0.735	0.08681	0.0003891		1.22e-08	0.1104	0.546
6	32593465	rs9271718	HLA-DQA1	intergenic	NA	NA	T	A	Imputed	0.1965	0.6038	0.09778	6.32e-06	0.1922	0.8366	0.1208	0.1398	6.23e-06		Imputed	0.3309	0.7424	0.08528	0.0004782		1.37e-08	0.0879	0.589
6	32593522	rs9271722	HLA-DQA1	intergenic	NA	NA	G	C	Imputed	0.1896	0.6086	0.09949	3.45e-06	0.171	0.8434	0.1263	0.1775	5.5e-06		Imputed	0.3161	0.7319	0.08676	0.0003216		8.01e-09	0.112	0.543
6	32593649	rs9271735	HLA-DQA1	intergenic	NA	NA	A	G	Imputed	0.1878	0.6091	0.09951	5.18e-06	0.1712	0.8462	0.1264	0.1863	8.16e-06		Imputed	0.3158	0.7426	0.08708	0.0006316		2.35e-08	0.1023	0.561
6	32593690	rs9271737	HLA-DQA1	intergenic	NA	NA	C	T	Imputed	0.3044	0.6632	0.08255	1.6e-06	0.274	0.8042	0.1068	0.0414	3.9e-07		Imputed	0.4623	0.6927	0.0796	3.98e-06		7.21e-12	0.3471	0.055
6	32594028	rs9271762	HLA-DQA1	intergenic	NA	NA	G	T	Imputed	0.1805	0.6412	0.1006	2.15e-05	0.1673	0.8327	0.1277	0.1517	1.89e-05		Imputed	0.3084	0.7205	0.08892	0.0002277		1.71e-08	0.2721	0.232
6	32594176	rs9271767	HLA-DQA1	intergenic	NA	NA	T	G	Imputed	0.1769	0.6391	0.1016	3.33e-05	0.1605	0.8424	0.131	0.1908	3.72e-05		Imputed	0.3108	0.7205	0.08815	0.0001997		2.85e-08	0.2473	0.284
6	32594217	rs9271769	HLA-DQA1	intergenic	NA	NA	T	G	Imputed	0.1774	0.6286	0.1015	2.31e-05	0.1612	0.8343	0.1309	0.1662	2.28e-05		Imputed	0.3117	0.733	0.08755	0.0003884		3.57e-08	0.2144	0.351
6	32594328	rs9271775	HLA-DQA1	intergenic	NA	NA	C	T	Genotyped	0.3198	1.347	0.07236	1.81e-06	0.3545	1.199	0.0962	0.05914	6.71e-07		Imputed	0.1662	1.324	0.09953	0.004785		3.1e-08	0.6122	0
6	32594341	rs9271776	HLA-DQA1	intergenic	NA	NA	C	T	Genotyped	0.1892	0.6088	0.09941	3.26e-06	0.1705	0.8498	0.1264	0.1979	6.2e-06		Genotyped	0.3162	0.7352	0.08652	0.0003779		1.06e-08	0.1014	0.563
6	32594403	rs3104393	HLA-DQA1	intergenic	NA	NA	T	C	Imputed	0.1889	0.615	0.09901	1.57e-05	0.1741	0.8417	0.1264	0.1729	1.77e-05		Imputed	0.3162	0.7324	0.08665	0.0003248		2.37e-08	0.1323	0.506
6	32594441	rs3129766	HLA-DQA1	intergenic	NA	NA	G	A	Imputed	0.1931	0.6114	0.09743	1.61e-05	0.1925	0.8294	0.1208	0.1215	1.11e-05		Imputed	0.3315	0.7365	0.08528	0.0003359		1.58e-08	0.1227	0.523
6	32596475	rs2133035	HLA-DQA1	intergenic	NA	NA	A	C	Imputed	0.1837	0.606	0.0999	1.16e-05	0.1723	0.8626	0.1261	0.2409	2.35e-05		Imputed	0.3161	0.736	0.0865	0.0003955		3.76e-08	0.0794	0.605
6	32598581	rs9272025	HLA-DQA1	intergenic	NA	NA	A	C	Imputed	0.1866	0.606	0.09973	7.3e-06	0.1723	0.8626	0.1261	0.2409	1.63e-05		Imputed	0.316	0.7364	0.08649	0.0004039		2.75e-08	0.0789	0.606
6	32600468	rs116499104	HLA-DQA1	intergenic	NA	NA	A	G	Imputed	0.07223	1.569	0.1184	4.25e-06	0.0825	1.654	0.1617	0.001857	2.87e-08		Imputed	0.03928	1.378	0.1781	0.0716		1.61e-07	0.7382	0
6	32601270	rs117686044	HLA-DQA1	intergenic	NA	NA	T	C	Imputed	0.07355	1.508	0.1186	1.54e-05	0.08216	1.666	0.1625	0.001677	9.08e-08		Imputed	0.04372	1.502	0.1676	0.0152		2.98e-08	0.867	0
6	32604124	rs9272320	HLA-DQA1	near-gene-5	NA	NA	A	G	Imputed	0.3956	0.6131	0.07616	8.42e-10	0.3712	0.7787	0.09775	0.01051	1.01e-10		Imputed	NA	NA	NA	NA		NA	NA	NA
6	32607055	rs77888377	HLA-DQA1	intron	NA	NA	C	T	Imputed	0.1857	1.268	0.0849	3.23e-06	0.2033	1.522	0.1143	0.0002383	3.1e-09		Imputed	0.05878	1.09	0.1574	0.5822		3.56e-06	0.1986	0.381
6	32608817	rs28621855	HLA-DQA1	intron	NA	NA	C	T	Imputed	0.04255	1.702	0.1452	2.1e-08	0.06054	1.534	0.1905	0.02466	4.96e-09		Imputed	NA	NA	NA	NA		NA	NA	NA
6	32611647	rs28566533	HLA-DQA1	near-gene-3	NA	NA	C	G	Imputed	0.06838	1.541	0.1222	5.17e-06	0.07959	1.655	0.1659	0.002375	4.42e-08		Imputed	0.03825	1.332	0.1824	0.1159		5.29e-07	0.6705	0
6	32611764	rs36214157	HLA-DQA1	near-gene-3	NA	NA	C	T	Imputed	0.06838	1.541	0.1222	5.17e-06	0.07959	1.655	0.1659	0.002375	4.42e-08		Imputed	0.03825	1.332	0.1824	0.1159		5.29e-07	0.6705	0
6	32615272	rs28452520	HLA-DQA1	intergenic	NA	NA	G	C	Imputed	0.04173	1.729	0.147	3.17e-08	0.05986	1.595	0.1935	0.01583	3.82e-09		Imputed	NA	NA	NA	NA		NA	NA	NA
6	32620283	rs17843604	HLA-DQA1	intergenic	NA	NA	T	C	Genotyped	0.4015	0.6295	0.07447	4.77e-10	0.3775	0.795	0.0961	0.01698	1.21e-10		Genotyped	0.5603	0.905797	0.07436	0.1813		2.73e-08	0.0023	0.836
6	32628960	rs2515895	HLA-DQB1	intron	NA	NA	C	T	Imputed	0.1858	0.4836	0.104	3.84e-08	0.1675	0.8338	0.1269	0.1521	1.22e-07		Imputed	NA	NA	NA	NA		NA	NA	NA
6	32629680	rs2854272	HLA-DQB1	intron	NA	NA	G	A	Imputed	0.3541	0.704	0.07603	3.94e-08	0.3366	0.8636	0.09807	0.1348	1.02e-07		Imputed	NA	NA	NA	NA		NA	NA	NA
6	32635197	rs74201448	HLA-DQB1	near-gene-5	NA	NA	C	T	Imputed	0.1925	0.5369	0.09946	4.81e-08	0.1832	0.8219	0.1225	0.1095	8.62e-08		Imputed	NA	NA	NA	NA		NA	NA	NA
6	32639510	rs9274810	HLA-DQB1	intergenic	NA	NA	G	C	Imputed	0.02514	1.924	0.1792	1.31e-09	0.03798	1.867	0.2472	0.01151	1.61e-10		Imputed	NA	NA	NA	NA		NA	NA	NA
6	32642794	rs149288329	HLA-DQB1	intergenic	NA	NA	C	T	Imputed	0.02511	1.924	0.1792	1.27e-09	0.03798	1.867	0.2472	0.01151	1.55e-10		Imputed	NA	NA	NA	NA		NA	NA	NA
6	32654919	rs145291666	HLA-DQB1	intergenic	NA	NA	T	C	Imputed	0.02605	1.924	0.1785	2.63e-09	0.03798	1.868	0.2471	0.01144	2.9e-10		Imputed	NA	NA	NA	NA		NA	NA	NA
6	32664698	rs142451601	HLA-DQB1	intergenic	NA	NA	A	C	Imputed	0.02647	1.921	0.1775	3.79e-09	0.03894	1.858	0.2439	0.0111	3.79e-10		Imputed	NA	NA	NA	NA		NA	NA	NA
6	32673729	rs71565343	HLA-DQA2	intergenic	NA	NA	C	T	Imputed	0.04339	1.655	0.1462	9.51e-08	0.05713	1.617	0.1955	0.014	8.44e-09		Imputed	NA	NA	NA	NA		NA	NA	NA
6	32673968	rs71565345	HLA-DQA2	intergenic	NA	NA	G	C	Imputed	0.04616	1.656	0.1453	2.89e-07	0.05945	1.562	0.1926	0.02053	3.56e-08		Imputed	NA	NA	NA	NA		NA	NA	NA
